# 1 Regulation of nerve growth and patterning by cell surface protein disulphide 2 isomerase

3 Cook, Geoffrey M.W.<sup>1</sup>, Sousa, Catia<sup>1</sup>, Schaeffer, Julia<sup>1,2</sup>, Wiles, Katherine<sup>1,3</sup>,  
4 Jareonsettasin, Prem<sup>1,4</sup>, Kalyanasundaram, Asanish<sup>1,5</sup>, Walder, Eleanor<sup>1,5</sup>, Casper,  
5 Catharina<sup>1,6</sup>, Patel, Serena<sup>1,5</sup>, Chua, Pei Wei<sup>1,7</sup>, Riboni-Verri, Gioia<sup>1,8</sup>, Raza,  
6 Mansoor<sup>9</sup>, Swaddiwudhipong, Nol<sup>1</sup>, Hui, Andrew<sup>1</sup>, Abdullah, Ameer<sup>1</sup>, Wajed, Saj<sup>1,10</sup>,  
7 Keynes, Roger J.<sup>1</sup>

8  
9 <sup>1</sup>Department of Physiology, Development and Neuroscience, University of  
10 Cambridge, Cambridge, U.K.,

11 <sup>2</sup>Grenoble Institute des Neurosciences, Bâtiment Edmond J. Safra, Chemin Fortuné  
12 Ferrini, Site Santé, 38706 La Tronche Cedex, France

13 <sup>3</sup>2 More London Riverside, London, SE1 2AP, U.K.

14 <sup>4</sup>Exeter College, Turl Street, Oxford, OX1 3DP, U.K.

15 <sup>5</sup>School of Clinical Medicine, Cambridge University Hospitals, CB2 0QQ, U.K.

16 <sup>6</sup>Winter, Brandl, Fürniss, Hübner, Röss, Kaiser & Polte, Partnerschaft mbB, Patent  
17 und Rechtsanwaltskanzlei, Bavariaring 10, 80336 München, Germany

18 <sup>7</sup>School of Medicine and Health Sciences, Monash University, Jalan Lagoon Selatan,  
19 Bandar Sunway, 46150, Selangor DE, Malaysia

20 <sup>8</sup>School of Medicine, Medical Science and Nutrition, University of Aberdeen, Polwarth  
21 Building, Aberdeen AB25 2ZD, U.K.

22 <sup>9</sup>Cambridge Innovation Capital, Hauser Forum, 3 Charles Babbage Road, Cambridge  
23 CB3 0GT, U.K.

24 <sup>10</sup>University of Exeter Medical School.

25  
26 Corresponding author: Roger Keynes, Department of Physiology, Development &  
27 Neuroscience, University of Cambridge, Downing Street, Cambridge CB2 3DY, U.K.  
28 [rjk10@cam.ac.uk](mailto:rjk10@cam.ac.uk)

## 30 Abstract

31 Contact repulsion of growing axons is an essential mechanism for spinal nerve  
32 patterning. In birds and mammals the embryonic somites generate a linear series of  
33 impenetrable barriers, forcing axon growth cones to traverse one half of each somite  
34 as they extend towards their body targets. This study shows that protein disulphide  
35 isomerase provides a key component of these barriers, mediating contact repulsion  
36 at the cell surface in half-somites. Repulsion is reduced both *in vivo* and *in vitro* by a  
37 range of methods that inhibit enzyme activity. The activity is critical in initiating a nitric  
38 oxide/S-nitrosylation-dependent signal transduction pathway that regulates the  
39 growth cone cytoskeleton. Rat forebrain grey matter extracts contain a similar  
40 activity, and the enzyme is expressed at the surface of cultured human astrocytic  
41 cells and rat cortical astrocytes. We suggest this system is co-opted in the brain to  
42 counteract and regulate aberrant nerve terminal growth.

## 44 Introduction

45 Peripheral spinal nerves have a striking anatomical periodicity, or segmentation,  
46 that reflects their necessary isolation from the segments of developing bone that will  
47 form the vertebral column. This study sets out to identify the molecular basis of this  
48 patterning. We find a critical role for the enzyme protein disulfide isomerase in  
49 separating outgrowing axons from the somite cells that generate the vertebrae, and  
50 provide evidence regarding the underlying mechanism.

51 In avian and mammalian embryos, both outgrowing motor and sensory axons, and  
52 migrating neural crest cells, encounter the periodic somites that flank both sides of  
53 the neural tube (future spinal cord). Here they traverse preferentially the anterior (A,  
54 rostral/cranial) - rather than posterior (P, caudal) - halves of each successive

55 somite<sup>1-4</sup>. For neural crest cells this preference has been shown to depend on  
56 repulsive signalling in the P-half-somite by members of the Semaphorin/Neuropilin-  
57 and Ephrin/Eph protein families<sup>5-9</sup>. However the basis of axonal segmental  
58 patterning has remained elusive.

59 We previously identified contact repulsion as the main cellular mechanism  
60 generating axonal patterning<sup>10,11</sup>. Sequential repulsion of outgrowing motor and  
61 sensory axons in successive P-half-sclerotomes (future vertebrae) forces axons to  
62 traverse the anterior (A/cranial) halves. We showed that extracts of chick embryo  
63 somites cause growth cone collapse of both motor and sensory axons *in vitro*<sup>10</sup>, a  
64 phenomenon that is widely used as a method for identifying molecules that regulate  
65 growth cone motility<sup>12,13</sup>. Additionally we found that the lectins peanut agglutinin  
66 (PNA) and jacalin bind selectively to the surface of P-half-sclerotome cells rather  
67 than A-half-sclerotome cells<sup>10,14</sup>. Immobilized PNA can be used to deplete collapse  
68 activity, and activity is recovered by lactose elution. Biochemical purification led to  
69 the identification of two PNA-binding glycoproteins shown by SDS-PAGE as two  
70 silver staining bands of 48kDa and 55kDa<sup>10</sup>.

71

## 72 **Results**

### 73 *Identification of cell surface PDI in somites*

74 In the present work we combined PNA affinity purification with more effective  
75 inhibition of protease activity in the somite extracts, and examined the lactose eluates  
76 by semi-preparative SDS PAGE. This revealed a major silver-staining band of  
77 apparent molecular weight 57kDa, closely matching the 55kDa band seen in the  
78 earlier study<sup>10</sup> (*Figure 1a*). The band was excised and submitted for tryptic digestion  
79 and mass spectrometry, revealing 57 peptides distributed throughout the extent of  
80 the enzyme protein disulphide isomerase/PDIA1/P4HB (*Figure 1-figure supplement*  
81 *1a*).

82 PDIA1/P4HB is one of a PDI-family of proteins that share in common a  
83 thioredoxin-like structural fold<sup>15</sup>. It is known principally as an intracellular enzyme  
84 localized in the endoplasmic reticulum (ER), where it regulates protein folding by  
85 catalyzing the formation and breakage of disulfide bonds<sup>16-18</sup>. A PDIA1-related  
86 molecule was also identified previously as a retina-specific candidate cell adhesion  
87 molecule<sup>19,20</sup>. Our finding that somite cell surface PDI (csPDI) binds PNA, and is  
88 lactose-elutable from immobilized PNA, indicates that this form of PDI is O-  
89 glycosylated. This is supported by the observation that csPDI expressed by Jurkat T  
90 cells, immortalized from human T cell leukaemia, also possesses PNA-binding O-  
91 glycans, the elongation of which can be blocked experimentally<sup>21,22</sup>. In addition,  
92 using a sensitive fluorescent reductase assay<sup>23</sup> we found that commercially purified  
93 (bovine liver) PDI does not bind to PNA-agarose, indicating that somite csPDI has an  
94 affinity for PNA based on its glycosylation state (*Figure 1-figure supplement 1b*). The  
95 expression of PDI at the surface of P-half-sclerotome cells was confirmed by live-  
96 staining of microdissected strips of chick somites, using both polyclonal anti-PDI  
97 antibody and fluorescently labelled PNA, which showed co-localization at the cell  
98 periphery in the P-half-sclerotome (*Figure 1B-F*). Also the onset of PNA staining in  
99 the P-half-sclerotome was found to precede the first emergence of motor and  
100 sensory axon outgrowth in the A-half-sclerotome by ~1.5-3 hours (*Figure 1-figure*  
101 *supplement 1c,d*)

102

### 103 *csPDI mediates spinal nerve patterning in vivo*

104 A role for csPDI in mediating repulsion of outgrowing spinal axons *in vivo* was  
105 tested by siRNA knockdown of csPDI expression in chick embryo somites *in ovo*,  
106 predicted to promote outgrowth of motor and sensory axons into the P-half-  
107 sclerotomes. A construct was designed on the basis of the study of Zai *et al.*<sup>24</sup>. They

108 used an antisense oligodeoxynucleotide directed against a 24 base pair target  
109 sequence in the 3' UTR of PDIA1/P4HB to show that csPDI expression in human  
110 erythroleukaemia cells is markedly reduced (>70%) without significantly affecting cell  
111 viability. The efficacy and specificity of this construct has also been shown by  
112 others<sup>25,26</sup>. We initially confirmed that the chick siRNA construct inhibits expression  
113 of csPDI in primary cultures of chick retinal cells and P-half-sclerotome cells (*Figure*  
114 *2-figure supplement 2a-d*). PDI gene knockdown *in ovo* was then carried out by  
115 microinjection of the siRNA, incorporated in a polyethylene glycol matrix, into at least  
116 8 somites on one side of the embryo, anterior to the most recently formed somite  
117 (stage 9-12<sup>27</sup>; *Figure 2a*). Confirmation of cs-PDI knockdown using Western blotting  
118 was not attempted due to the limiting availability of sufficient quantities of somite  
119 tissue, combined with the high ratio of constitutive PDI expression in the ER versus  
120 csPDI. As predicted however, PDI knockdown *in ovo* caused loss of extracellular  
121 PNA-binding in P-half-sclerotomes (*Figure 2-figure supplement 2e-g*). After siRNA  
122 injection and further incubation for 48 hours, spinal nerve outgrowth was assessed by  
123 immunohistochemistry using a neuron-specific- $\beta$ -III tubulin antibody (clone TUJ1),  
124 observer-blind to treatment condition. Embryos treated with control/scrambled siRNA  
125 showed normal axon segmentation, with growth restricted to the A-half-sclerotomes  
126 (*Figure 2b*). However PDI knockdown caused outgrowing motor axons to project  
127 additionally into the P-half-sclerotomes adjacent to the neural tube/spinal cord  
128 (*Figure 2c,d*), an abnormal trajectory not seen in untreated embryos or in those  
129 similarly treated with control/scrambled siRNA. Control experiments showed that  
130 expression of the A-half-somite polarity determinant gene *Tbx18* was unaffected by  
131 siRNA injection, whereas expression of the P-half determinant gene *Uncx4.1* was  
132 variably diminished in the treated region (*Figure 2-figure supplement 2h*). Since  
133 *Tbx18* expression did not alter correspondingly, this was unlikely to be due to a P-to-  
134 A switch in cell identity, or to reflect a change in cell viability due to reduced PDI  
135 expression. It may be explained if csPDI knockdown in P-half-sclerotome cells at the  
136 A/P boundaries causes some to mix with neighbouring A-half cells and down-  
137 regulate *Uncx4.1* expression as a result. Injection of scrambled siRNA did not cause  
138 detectable sclerotome caspase-3 expression.

139 To rule out the possibility that these phenotypes resulted from an off-target effect  
140 of the siRNA, control experiments confirmed that co-injection of siRNA with a FLAG-  
141 M1-epitope-tagged plasmid expressing human PDIA1/P4HB (>90% homologous to  
142 chicken PDIA1<sup>28</sup>) rescued the normal segmented axon phenotype (*Figure 2-figure*  
143 *supplement 2i-k*). We also found that inhibiting the enzyme activity of PDI caused a  
144 similar phenotype. PDI possesses two independent active sites, and the small  
145 molecule PACMA 31 has been shown to form a covalent bond with a cysteine  
146 residue of the second active site, thereby inhibiting its catalytic activity<sup>29</sup>. PACMA 31  
147 was applied *in ovo* using two delivery methods. First, as described above for siRNA  
148 delivery, PACMA 31 in solution (200 $\mu$ M) was injected directly into somites *in ovo* and  
149 the resulting axon phenotype assessed by immunohistochemistry. PACMA 56, an  
150 inactive substituted alkynyl derivative of PACMA 31 that does not bind to PDI<sup>29</sup>,  
151 acted as a control. Consistent with the results of siRNA knockdown, PACMA 31  
152 injection also caused abnormal axon projections into P-half-sclerotome whereas  
153 control/PACMA 56 injection did not (*Figure 2-figure supplement 2l-n*). In addition the  
154 A-P width of ventral roots increased after PACMA 31 injection, indicating axon  
155 defasciculation (*Figure 2-figure supplement 2o*).

156 The second PACMA delivery method involved impregnation of Affi-Gel Blue  
157 agarose beads (25-50 $\mu$ m diameter) with PACMA 31 or PACMA 56 (500 $\mu$ M), followed  
158 by microsurgical implantation of single beads *in ovo* between the neural tube and  
159 newly-formed sclerotome in stage 12-14 chick embryos. After further incubation for  
160 24-36 hours, axon trajectories were assessed in the implant region by whole-mount  
161 immunohistochemistry. As with siRNA knockdown, PACMA 31 caused abnormal

162 axon outgrowth into P-half-somite territory (*Figure 2e,f*, 14/29 embryos). Using  
163 PACMA 56 as control, only an occasional axon outgrowth abnormality (1/20  
164 embryos) was observed; in 19/20 embryos, axons were confined to the A-half-  
165 sclerotomes as in normal embryos (*Figure 2g*).

166  
167 *csPDI mediates axon repulsion via nitric oxide signalling/S-nitrosylation*

168 To elucidate the mechanism of action of csPDI we first tested whether PDI causes  
169 growth cone collapse by direct interaction with the growth cone surface. The purified  
170 bovine enzyme incorporated in liposomes was added at a range of concentrations  
171 (25-1000ng/ml) to cultures of chick embryo dorsal root ganglia (DRGs) extending  
172 sensory axons on laminin in the presence of nerve growth factor (NGF). However this  
173 did not increase collapse above the control levels (0-20% of growth cones) seen after  
174 addition of phosphate-buffered saline (PBS) or untreated liposomes (*Figure 3a*).

175 Nitric oxide (NO) has been shown to elicit growth cone collapse *in vitro* when  
176 released in solution from a NO donor (3-morpholino-sydononimine, SIN-1)<sup>30</sup>.  
177 Moreover Zai *et al.*<sup>24</sup> have shown that NO entry into csPDI-expressing human  
178 erythroleukemia cells involves a transnitrosation mechanism catalyzed by the  
179 enzyme. Physiological NO donor S-nitrosothiol (SNO) levels have been estimated in  
180 human cerebrospinal fluid and plasma at low micromolar concentrations (respectively  
181  $0.86 \pm 0.04 \mu\text{M}$ <sup>31</sup> and  $1.77 \pm 0.32 \mu\text{M}$ <sup>32</sup>). We therefore tested whether application of PDI  
182 in combination with S-nitrosoglutathione (GSNO, 1  $\mu\text{M}$ ) as NO donor causes growth  
183 cone collapse. Whereas application of GSNO alone in solution did not elicit collapse  
184 above control levels, significant collapse was observed when GSNO was first  
185 combined with PDI (125ng/ml) and then added to DRG cultures (~60% growth cones  
186 collapsed after 1h, *Figure 3b*). To confirm that PDI+GSNO-induced collapse in  
187 solution is reproduced in the liposome-based collapse assay, we found that the PDI  
188 concentration dependence of collapse was similar in both cases. (*Figure 3-figure*  
189 *supplement 3a,b*). Also the time course of PDI+GSNO-induced collapse was similar  
190 to that induced by somite extracts, and contrasted with the more rapid onset of  
191 collapse induced by the soluble repellent Sema3A (*Figure3-figure supplement 3c-e*).

192 We next tested the PDI inhibitors purified-bacitracin<sup>33</sup>, anti-PDI neutralizing  
193 antibody, phenylarsine oxide (PAO)<sup>34</sup>, acetylated triiodothyronine (T3)<sup>35</sup> and 16F16<sup>36</sup>  
194 on PDI+GSNO-induced collapse when applied in solution. Of these, three inhibitors  
195 (bacitracin, neutralizing antibody and PAO) were most effective in reducing collapse  
196 when incorporated in liposomes with PDI (*Figure 3-figure supplement 3f-k*). With the  
197 publication of the small molecule PDI-inhibitor PACMA 31 and its control PACMA  
198 56<sup>29</sup>, the candidacy of csPDI in mediating somite extract (SE)-induced collapse was  
199 further confirmed using PACMA 31 in liposomes, which inhibited collapse by >50%  
200 whereas PACMA 56 was inactive (*Figure 3c*).

201 PDI has two active sites, each with the amino acid sequence WCGHCK. Sliskovic  
202 *et al.*<sup>37</sup> have shown that PDI can be S-nitrosylated (PDI-SNO), and that the enzyme  
203 can also act as a denitrosylase resulting in NO<sup>•</sup> release as a free radical. They have  
204 proposed that PDI-SNO is denitrosylated by a one-electron reduction mechanism at  
205 the second active site. Moreover they showed that glutathione (GSH) is the most  
206 effective reducing agent, and that no significant denitrosylation is observed using  
207 reducing agents dithiothreitol (DTT) or L-homocysteine<sup>37</sup>. Consistent with their study,  
208 we found that when PDI+GSNO or somite extracts were incorporated in liposomes  
209 and subsequently treated with GSH (3mM), collapse activity was lost. However  
210 identical experiments using 3mM DTT or L-homocysteine did not affect collapse  
211 activity. Notably, GSH did not block collapse when applied at 3  $\mu\text{M}$ , within the  
212 extracellular concentration range typically present *in vivo* and 3 orders of magnitude  
213 below the ambient intracellular concentration range<sup>38</sup> (*Figure 3d*; see Discussion).  
214 Also consistent with the observations of Sliskovic *et al.*<sup>37</sup>, somite extract-induced  
215 collapse was inhibited by 3mM GSH but not by 3mM L-homocysteine (*Figure 3e*).



216 Further evidence that a NO-based mechanism elicits growth cone collapse was  
217 provided by the finding that myoglobin, regarded as a pseudo-enzymatic NO  
218 scavenger<sup>39,40</sup>, inhibited collapse induced by PDI+GSNO and by somite extracts  
219 (*Figure 3f*). PDI+GSNO-induced collapse was also inhibited by the membrane-  
220 impermeable NO-scavenger carboxy-2-Phenyl-4,4,5,5-tetramethylimidazole-1-oxyl  
221 3-oxide (C-PTIO; *Figure 3g*). Somite extract-induced collapse was additionally  
222 prevented by pre-treatment of DRGs with the neuronal nitric oxide synthase (nNOS)  
223 inhibitor L-NAME, but not by its control/chiral isomer D-NAME, indicating a role for  
224 nNOS activity in the collapse process (*Figure 3h*).

225 These experiments implicate NO signalling in somite-induced growth cone  
226 repulsion. The *in vitro* study of Stroissnigg *et al.*<sup>41</sup> has likewise shown a role for S-  
227 nitrosylation of the microtubule-associated protein MAPB1 in mediating mouse DRG  
228 growth cone collapse caused by stimulation of nNOS by the calcium ionophore  
229 calcimycin/A23187. They showed further that S-nitrosylation of Cys 2457 in the  
230 MAP1B light chain sub-unit (LC1) is a critical event in the cytoskeletal dynamics  
231 underlying collapse. To examine expression of S-nitrosylated proteins in somites, we  
232 therefore carried out Western blotting of cell-free somite extracts using iodoTMT<sup>TM</sup>  
233 reagent, which gives lower background labelling compared with biotin labelling. The  
234 assay was prepared from 650 dissected somite strips homogenised in HENS buffer.  
235 Remarkably only one major band (molecular weight 38kDa) was detectably S-  
236 nitrosylated (*Figure 3i*). We additionally confirmed, by Western blotting using a  
237 mouse monoclonal antibody against amino acids 2257-2357 in LC1 of mouse MAP-  
238 1B (see Methods), that this S-nitrosylated somite protein reacts strongly with the anti-  
239 LC1 antibody (*Figure 3j*). Also the nNOS inhibitor L-NAME inhibited both S-  
240 nitrosylation of the 38kDa protein (*Figure 3k*) and somite extract-induced growth cone  
241 collapse (*Figure 3h*), while the control stereoisomer D-NAME was without effect  
242 (*Figure 3h,k*). These findings indicate that a molecular mechanism similar to that  
243 proposed by Stroissnigg *et al.*<sup>41</sup> operates within the growth cone during its repulsion  
244 by somites *in vivo*.

245  
246 *csPDI activity in mammalian forebrain grey matter*

247 We previously found that, as for somites, extracts of adult mammalian and chicken  
248 forebrain grey matter also cause sensory/DRG axon growth cone collapse that can  
249 be depleted by the use of immobilized PNA. This suggested that a contact-repulsive  
250 system similar to that in somites may be expressed in the mature CNS<sup>42</sup>. In  
251 confirmation we found that immobilized jacalin, a lectin that binds the same O-linked  
252 disaccharide (Gal $\beta$ 1-3GalNac) as does PNA, but unlike PNA is not selective for its  
253 de-sialylation, can be used to deplete collapse induced by rat forebrain extracts  
254 (RFE; *Figure 4-figure supplement 4a*). Ghosh and David<sup>43</sup> have also described a  
255 growth cone collapse-inducing activity in membrane preparations of rat cerebral  
256 cortical grey matter. We therefore tested whether, as for somite extracts, a range of  
257 inhibitors of PDI activity block RFE-induced collapse, and found this was the case.  
258 Application of PACMA 31 (5 $\mu$ M) significantly reduced collapse (by 50-60%) whereas  
259 PACMA 56 (5 $\mu$ M) did not (*Figure 4a, Figure 4-figure supplement 4b*). Another small  
260 molecule PDI-inhibitor, quercetin-3-O-rutinoside<sup>44</sup> inhibited RFE-induced collapse  
261 when used at both 1 $\mu$ M and 50 $\mu$ M (*Figure 4b*). RFE-induced collapse activity was  
262 immunodepleted using polyclonal anti-PDI antibody but not using IgG or bovine  
263 serum albumin (BSA) as sham protein controls (*Figure 4c*). Moreover, as for somite  
264 extracts, application of 3mM GSH reduced RFE-induced growth cone collapse,  
265 whereas 3mM DTT, 3mM L-homocysteine (L-HC) or 3 $\mu$ M GSH did not (*Figure 4d*). At  
266 GSH concentrations between 3 $\mu$ M and 3mM, inhibition of collapse increased with  
267 concentration (*Figure 4-figure supplement 4c*). Last, and again consistent with a NO-  
268 based mechanism, we confirmed that application of the NO scavengers myoglobin  
269 and C-PTIO depleted RFE-induced collapse (*Figure 4-figure supplement 4d,e*).

270 One source of csPDI in the brain may be the astrocyte, which shares fate  
271 specification by the transcription factor SOX9 with P-half-sclerotome cells (future  
272 vertebral cartilage)<sup>45-47</sup>. In support of this, live-staining experiments showed that  
273 csPDI is expressed on the surface of cultured human astrocytic cells, as for P-half-  
274 sclerotome cells (*Figure 4e*). Moreover extracts of these cells caused growth cone  
275 collapse that was removed by the use of immobilized PNA and jacalin (*Figure 4-*  
276 *figure supplement 4f*), and a cell surface preparation isolated from rat primary cortical  
277 astrocytes was found to contain csPDI (*Figure 4-figure supplement 4g*).

278 Collectively these experiments indicate that csPDI is a major component of the  
279 growth cone collapse-inducing activity detectable in the grey matter of the mature  
280 mammalian brain. The NGF-dependent primary sensory neurons assessed here  
281 project axons *in vivo* in the CNS as well as PNS, making synapses in the dorsal horn  
282 of the spinal cord and in the brainstem. We have shown previously that two  
283 populations of CNS-restricted neurons are also responsive to the somite contact-  
284 repellent system. When explants of embryonic day-4 (E4) chick telencephalon or E7  
285 retina are grafted *in ovo* in place of chick spinal cord, their axons avoid P-half-  
286 somites<sup>42,48</sup>. Moreover chick retinal axon growth cones collapse in response to  
287 somite extracts *in vitro*<sup>48</sup>, and in further confirmation we found that they collapse in  
288 response to PDI+GSNO (*Figure 4-figure supplement 4h*).

289

## 290 Discussion

291 The significance of PDI as an ER-based foldase/isomerase is well known, but the  
292 biological role of csPDI is less clear-cut. It has been implicated in processes such as  
293 platelet aggregation and thrombosis, and in animal cell infection by a variety of micro-  
294 organisms<sup>17</sup>. Here we have identified a key function for csPDI in contact repulsion  
295 using a biological system. Consistent with its location at the cell surface, somite  
296 csPDI is an O-glycosylated protein, as shown by our lectin-binding studies<sup>10</sup> and by  
297 Bi *et al.* for human Jurkat T cells<sup>21</sup>. In keeping with this, it has been shown that  
298 contact between a single DRG growth cone filopodium and the surface of a P-half-  
299 somite cell *in vitro* is sufficient to initiate a rapid filopodial withdrawal/repulsive  
300 response, followed by reorientation of the growth cone away from the cell<sup>49</sup>. The  
301 rapid nature of this response, combined with our finding that somite extract collapse-  
302 inducing activity is depleted using the lectins PNA and jacalin<sup>10</sup>, argue strongly that  
303 repulsion is likely to arise from the activity of csPDI rather than ER-based PDI. These  
304 lectins have specificity for O-glycans that are synthesised and linked to protein in the  
305 Golgi apparatus before the glycoprotein is transported to the cell surface. Also  
306 consistent with a repulsion mechanism, inhibition of PDI activity *in vivo*, using either  
307 siRNA knockdown or PACMA 31 inhibition of enzyme activity, causes axons to  
308 traverse the P-half-somites. Since PDI is a multifunctional enzyme operating both  
309 within and outside cells, it is possible that this phenotype might arise for other  
310 reasons. However we used the same target for gene knockdown experiments as  
311 used by Zai *et al.*<sup>24</sup>, who showed that cell viability is unperturbed despite inhibition of  
312 csPDI expression. Additionally we saw no change in somite morphology despite loss  
313 of lectin binding at the cell surface.

314 In chick somites the onset of csPDI expression in P-half-sclerotome immediately  
315 precedes the first emergence of spinal axons in the A-half. This matches well the  
316 proposed function of csPDI in mediating contact repulsion of outgrowing motor and  
317 sensory axons. The selective migration of neural crest cells in A-half-sclerotomes,  
318 which precedes by several hours the first axon outgrowth at each segmental level in  
319 the chick embryo, is likewise matched temporally by the onset of expression of the  
320 diffusible repellent Sema3F in newly-formed P-half-sclerotomes<sup>5</sup>. This implies that  
321 segmental patterning of neural crest cells and axons is regulated predominantly by  
322 distinct molecular signals. Supporting this, the Eph-family receptor tyrosine kinase  
323 EphB2 and its ligand ephrin-B1 have been additionally implicated in somite-based

324 repulsion of neural crest cells<sup>7</sup>, but have been shown not to be necessary for motor  
325 axon segmentation<sup>8</sup>. The persistence of segmented spinal nerve patterning seen in  
326 both compound Neuropilin1/2 mutant mice<sup>9,50</sup>, and in ephrin-B mutant mice<sup>6</sup>, may  
327 therefore be explained if disrupted neural crest-repulsive signalling in these mice is  
328 compensated by segmental csPDI expression.

329 The models of Zai *et al.*<sup>24</sup> (using human erythroleukaemia cells), Ramachandran  
330 *et al.*<sup>51</sup> (using fibroblasts and endothelial cells) and Sliskovic *et al.*<sup>37</sup> have been  
331 proposed to explain how NO entry into these cells is regulated by a transnitrosation  
332 mechanism facilitated by csPDI. These *in vitro* cellular models are directly applicable  
333 to the axon growth cone/somite system *in vivo*. We suggest that csPDI acts as a de-  
334 nitrosylase, operating constitutively at the P-half-somite cell surface to promote the  
335 transfer of NO<sup>-</sup> from extracellular S-nitrosothiols into the cytosol of contacting growth  
336 cone filopodia, thereby initiating repulsion/collapse. Extracellular S-nitrosoglutathione  
337 (GSNO) may provide a ubiquitous source of NO donor, as suggested for csPDI  
338 activity in the context of platelet aggregation<sup>52</sup>. Critically we have shown that its  
339 ambient extracellular concentration *in vivo* (~1µM) is sufficient, in combination with  
340 purified PDI, to elicit growth cone collapse *in vitro*. Alternatively or additionally, other  
341 NO donors may be involved.

342 The transnitrosation model is well supported by the finding that DRG/sensory axon  
343 growth cones collapse when exposed *in vitro* to 3-morpholino-syndoninime (SIN-1),  
344 which spontaneously dissociates in solution to release NO<sup>30</sup>. SIN-1-induced collapse  
345 is prevented by the presence of haemoglobin, which binds released NO<sup>30</sup>, and we  
346 have shown that both myoglobin, which similarly binds released NO, and the  
347 membrane-impermeable NO-scavenger PTIO<sup>53</sup> deplete the collapse-inducing activity  
348 of somite extracts. Moreover nNOS inhibition by L-NAME prevents such collapse,  
349 indicating that NO signalling may be further amplified in the growth cone by nNOS  
350 activity.

351 How might NO signalling in the growth cone influence the cytoskeleton? Our  
352 results accord well with the proposal of Stroisnigg *et al.*<sup>41</sup> that, in axons extending *in*  
353 *vitro*, growth cone retraction is counteracted by a microtubule/dynein-based system.  
354 S-nitrosylation of LC1 induces a conformational change that enhances binding of the  
355 LC1-HC complex to microtubules, so blocking dynein action and promoting retraction  
356 over extension. Correspondingly, in the somite system *in vivo* both motor and  
357 sensory axon growth cones extending at the A/P-half-somite boundaries will make  
358 filopodial contact with P-half-somite cells expressing csPDI, triggering NO-mediated  
359 repulsive signalling. Consistent with this, using the iodo-TMT reagent we find that  
360 LC1 is the only S-nitrosylated protein detected in cell free extracts of dissected  
361 somite strips, which necessarily include growth cone proteins.

362 The observation that a repellent activity closely similar to the somite system is  
363 expressed in mammalian forebrain grey matter is of particular interest, and extends  
364 the range of brain proteins originally identified as developmental axon repellents<sup>13,54</sup>.  
365 Collapse-inducing activity is significantly reduced using the lectins PNA and jacalin  
366 (this study and Keynes *et al.*<sup>42</sup>), and is also prevented using a variety of small  
367 molecule inhibitors (PACMA 31, rutinoides, GSH) as well as myoglobin and anti-PDI  
368 antibody. Our findings additionally implicate the astrocyte as a source of this activity,  
369 since human astrocytic (1718) cells and rat cortical primary astrocytes express  
370 csPDI, and 1718-cell-derived growth cone collapse activity is removed by  
371 immobilized PNA and jacalin. In view of the involvement of NO/S-nitrosylation  
372 signalling in the csPDI-mediated repulsion mechanism, rather than a protein-based  
373 ligand-receptor interaction, a broad range of CNS axon types may prove susceptible  
374 to it. And consistent this, we have shown previously that chick CNS (retinal and  
375 telencephalic) axons respond to the somite repellent *in vivo*<sup>42,48</sup>. It may also be  
376 significant that csPDI expression by human malignant glioblastoma cells has been  
377 related to their invasiveness within the brain<sup>55</sup>.

378 The neuron may be another source of brain-derived csPDI, since a recent  
379 proteomic analysis of CNS synaptic cleft proteins identified csPDI/P4HB among the  
380 most enriched candidates at both excitatory and inhibitory synapses in embryonic rat  
381 cortical neuronal cultures<sup>56</sup>; csPDI has also been identified at the surface of both  
382 neuroblastoma cells<sup>57</sup> and retinal cells<sup>20</sup>. Together with the experiments reported in  
383 this study, these findings collectively raise the possibility that csPDI is 'bifunctional' in  
384 promoting both adhesive and repulsive neuronal/glial interactions in the CNS.

385 In sum, this study reveals a novel role for the multifunctional enzyme PDI in the  
386 periodic patterning of peripheral spinal nerves, ensuring their separation in somites  
387 from developing cartilage and bone. The additional expression of csPDI at the  
388 astrocyte surface, and its function in repelling growing nerve terminals, suggest a  
389 promising candidate for regulating axon growth and plasticity that may be widely  
390 distributed in the developing and mature nervous system.



## 391 **Methods**

### 392 *Chick embryo grafting procedure*

393 Fertilized hens' eggs (Gallus gallus, Bovans Brown variety; Winter Egg Farms,  
394 Fowlmere, Cambridgeshire) were incubated at 38°C to obtain embryos at stage 12-  
395 14<sup>27</sup> (16-22 somites). Eggs were windowed and 0.2-0.5mL of a 1:10 mixture of India  
396 ink (Fount India, Pelikan) and phosphate-buffered saline (PBS) was injected into the  
397 sub-blastodermal space. The window was lined with silicone grease, and the embryo  
398 raised to the level of the shell by pipetting PBS into the egg through the window,  
399 creating a bubble of PBS held in place by the grease. An incision was made between  
400 the neural tube and newly-formed sclerotome on one side of the embryo, and a  
401 single Affi-Gel Blue agarose gel bead (BioRad, Cibacron blue coupled to agarose,  
402 30-50µm diameter) impregnated with PACMA31 or PACMA56 (500µM in PBS) was  
403 implanted into the resulting space (adjacent to the neural tube medially and  
404 notochord ventrally). Embryos were then re-incubated for 24-36h before fixing and  
405 processing for axon staining (see below) as whole-mounts or as (left and right) half-  
406 embryo-mounts. PACMA31 or PACMA56 solution was made by adding 0.5ml  
407 dimethylsulfoxide to 2.2mg PACMA to make a 10mM stock solution. This was diluted  
408 x20 in PBS to make a 500µM working solution, in which the Affigel beads were then  
409 placed for 2-3h at 21°C prior to implantation.

410

### 411 *Preparation of tissue extracts*

412 Stage 16-18 chick embryo trunks (comprising ectoderm, somites with DRG neurons,  
413 and motor axons, neural tube and notochord) or somite strips (ectoderm, somites  
414 with DRG neurons and motor axons) were dissected and immediately placed on solid  
415 CO<sub>2</sub> and transferred to -80°C for longer storage. Trunks from ~60 embryos were  
416 homogenised in 1ml solubilisation medium [2%w/v CHAPS in PBS made 1mM with  
417 sodium orthovanadate and 1 tablet cOmplete protease inhibitor cocktail (Roche) per  
418 50ml of solution] on wet ice by shearing through a 20G then 26G needle. Further  
419 homogenisation was carried out with grinding resin (GE Healthcare) and electrically-  
420 driven disposable pestles (GE Healthcare). Following centrifugation at 14,000g for  
421 5min at 4°C to remove the grinding resin, the supernatant fluid was centrifuged at  
422 100,000g for 1h at 4°C in a Beckman Optima TL ultracentrifuge using a TLS-55 rotor.  
423 Supernatant fluid was incorporated into liposomes as described by Davies *et al.*  
424 (1990)<sup>10</sup>. Pellets of 1718 cells were similarly extracted. Dissected rat (typically 3  
425 months old) forebrain grey matter was stored at -80°C and allowed to thaw on wet ice  
426 in the above solubilisation medium, ratio 0.5g wet weight tissue to 2ml medium.  
427 Following homogenisation in a Dounce Tissue Grinder (loose & tight fitting glass  
428 pestles were used in succession) and centrifugation at 14,000g for 5min at 4°C, the  
429 supernatant fluid was centrifuged at 100,000g for 1h at 4°C as described above. The  
430 clear supernatant fluid [14.9 ± 0.5µg protein/µl (s.e.m.)] from the latter centrifugation  
431 was used for incorporation into liposomes.

432

### 433 *Growth cone collapse assays*

434 These were carried out using whole- or half-DRGs dissected from embryonic day 7  
435 (E7) chick embryos (stage 30-32) or (for retinal axons) from dissected pieces (~50µm  
436 diameter) of E7 chick retina. DRG explants were grown for 24h on glass coverslips  
437 coated with poly-L-lysine (Sigma-Aldrich) and laminin (Sigma-Aldrich), in the  
438 presence of nerve growth factor (NGF, 40ng/ml, Sigma-Aldrich); full details of the  
439 assay method used in our laboratory have been published. Retinal explants were  
440 grown as for DRGs but without NGF and with medium supplemented with N-2  
441 (Sigma-Aldrich, 100x concentrate) and bovine pituitary extract (200µg/ml, Life  
442 Technologies). Cultures were fixed 1h after addition of each treatment, and growth  
443 cones were assessed by phase-contrast microscopy. They were classified as either  
444 spread or collapsed according to morphological criteria<sup>58</sup>. The validity of this method  
445 has been shown when compared to equivalent results using phalloidin staining<sup>59</sup> and

446 anti-tubulin staining<sup>60</sup>. Results are presented as the mean percentage collapse of  
447 growth cones extended from individual DRG explants.

448

#### 449 *Assessment of PDI inhibitors using collapse assay*

450 Conditions of controls and reagents were assigned randomly to each culture and all  
451 experiments were blind-coded. Unless otherwise specified all components were  
452 added simultaneously and incubated for 1h (37°C/5% CO<sub>2</sub>) before fixation. In  
453 experiments with antibody preparations, controls using the same concentration of  
454 non-immune rabbit IgG (Sigma-Aldrich G2018, Lot#051K7670), BSA and sodium  
455 azide were included. Immunodepletion experiments were performed using Magnetic  
456 Dyna Protein A beads (Invitrogen, 70µl packed beads) washed twice in 0.1M  
457 phosphate buffer (pH 8) with 0.01% Tween 20 (1ml) by end-over-end mixing for 2.5h  
458 at 4°C. Washed beads were added to rat forebrain extracts (RFE) containing either  
459 anti-PDI (Sigma-Aldrich P7496 Lot#054K4801), non-immune rabbit IgG or bovine  
460 serum albumin (BSA) and mixed end-over-end for 1h at 4°C. Beads were removed  
461 on a magnetic separator and the extract subjected to a repeated extraction with fresh  
462 beads. Treated extracts were incorporated into liposomes.

463

#### 464 *Live-staining of csPDI in whole-mounted somite-strips*

465 Stage 22-24 chick embryos were removed from the egg and washed in Leibovitz's L-  
466 15 medium (Thermo Fisher Scientific) supplemented with 1% L-Glutamine-Penicillin-  
467 Streptomycin solution (Sigma-Aldrich). Embryos were pinned out along the A-P axis,  
468 ventral-up, in a Sylgard (Dow Corning) coated dish containing medium. After removal  
469 of the endoderm, embryos were re-pinned dorsal-up and the neural tube,  
470 intermediate mesoderm and lateral plate mesoderm were separated from the  
471 paraxial/somite mesoderm. Strips of somite mesoderm were dissected and collected  
472 in 4-chambered cell culture slides (BD Falcon) containing L-15 medium and sheep  
473 serum (Sigma-Aldrich, 10% v/v) as blocking solution, and slides incubated for 15min.  
474 Primary anti-PDI antibody (Sigma-Aldrich P7496) or rhodamine-conjugated PNA  
475 (Vector labs) was added (1:500 v/v) to 3 chambers per slide and incubated for 1h at  
476 38°C. Strips were fixed with 4% formaldehyde for 30min, washed x3 with PBS, 5min  
477 per wash, then incubated with secondary antibody (anti-rabbit IgG, Invitrogen) for 2h  
478 at 21°C. Controls for anti-PDI binding, each in the 4th chamber per slide, were:  
479 absence of primary antibody, primary antibody pre-absorbed with purified bovine PDI  
480 (Sigma-Aldrich, P3818, concentration 5x molarity of anti-PDI antibody), and rabbit  
481 IgG (1:500). Slides were mounted with Fluoromount G (SouthernBiotech) and viewed  
482 using a Zeiss Axioskop fluorescence microscope. Each staining procedure was  
483 repeated at least x3.

484

#### 485 *Sclerotome and retinal cell staining and transfection*

486 Dissected somite strips were collected in a 2ml LoBind tube (Eppendorf) containing  
487 L15 medium, and sclerotome cells were dissociated with a 25G needle, after which  
488 20µl of cells were transferred into each chamber of a 4-chambered cell culture slide  
489 (BD Falcon) containing 490µl medium per chamber pre-warmed at 37°C. To maintain  
490 sclerotome differentiation a notochord fragment was added to each well. Slides were  
491 cultured in a humidified box at 37°C for 16h, after which csPDI was assessed by anti-  
492 PDI- and PNA-staining as described above for somite strips. For retinal cells, eyes  
493 were removed from stage 22-24 embryos using a microsurgical scalpel, and retinal cells  
494 dissociated and stained as for sclerotome cells. For siRNA transfection, cells were  
495 incubated at 38°C for 16h. 10µl of transfection mix [12.5µg siRNA in 100µl 5%  
496 glucose and 1.5µl Turbofect™ (Thermo Fisher Scientific)] in 490µl of DMEM  
497 (Sigma-Aldrich) supplemented with B-27 (Life Technologies) and NGF (Sigma-  
498 Aldrich) was then added to cultures. After overnight incubation at 38°C cells were  
499 washed x3 in DMEM and incubated for 3h with B-27/NGF-supplemented DMEM.

500

501 *Human astrocytic (1718) cell staining*

502 Human astrocytoma-derived 1718 cells [CCF-STTG1 (ATCC® CRL-1718TM)] were  
503 cultured in RPMI 1640 medium (ATCC modification, Gibco) supplemented with 10%  
504 fetal bovine serum (FBS; Gibco) and penicillin-streptomycin (Gibco). Cells were  
505 maintained at 37°C in 5% CO<sub>2</sub>. At each passage, cells were detached using Trypsin-  
506 EDTA (0.05%, Gibco), centrifuged at 1000g for 5min and plated in cell culture flasks  
507 (Nunc). After removing culture medium, cells were scraped in PBS or diethyl  
508 pyrocarbonate (DEPC) PBS and collected in an Eppendorf tube, then centrifuged at  
509 2,000g for 10min at 4°C. Re-suspended cells were washed once with RPMI 1640  
510 and blocked with RPMI 1640/10% goat serum (Sigma-Aldrich) for 10min at room  
511 temperature. They were plated in 4-well Millicell EZ slides (Millipore) coated with  
512 poly-L-lysine (0.01%, Sigma-Aldrich), at a concentration of 50,000 cells per well  
513 (1.7cm<sup>2</sup>). Cells were incubated with primary antibody in RPMI 1640/1% goat serum  
514 for 30min at 4°C, washed x3 with RPMI 1640, then incubated with secondary  
515 antibody in RPMI 1640/1% goat serum for 1h at 4°C and washed x3 with RPMI. Cells  
516 were fixed with 4% w/v formaldehyde and 15% w/v sucrose in PBS, pH 7.4, for  
517 10min at 21°C, then washed for 5min x3 with PBS. For live-cell imaging of the ER,  
518 cells were washed once with HBSS and incubated with ER-Tracker™ Green  
519 (BODIPY® FL Glibenclamide, Life Technologies) for 20min at 37°C. Cells were then  
520 washed x3 with HBSS and slides were mounted using Fluoromount-G (Southern  
521 Biotech). For intracellular immunostaining cells were washed x1 with PBS, fixed with  
522 4% w/v formaldehyde/15% w/v sucrose in PBS for 10min at 21°C, then washed for  
523 5min x3 with PBS. Cells were blocked with PBS with or without 0.1% Triton X-100  
524 (PBS-T) and 10% v/v goat serum for 1h at 21°C. They were then incubated in  
525 primary antibody in PBS-T/1% goat serum overnight at 4°C, washed x3 with PBS,  
526 incubated for 1h in secondary antibody in PBS-T at room temperature, then washed  
527 x3 with PBS. Nuclear staining was performed with 4',6-diamidino-2-phenylindole  
528 (DAPI, Sigma-Aldrich) diluted 1:4000 in PBS, or with Hoechst diluted 1:5000 in PBS.  
529 Primary antibodies were: rabbit anti-PDI (IgG polyclonal, Sigma-Aldrich) used at  
530 1:250 (live-staining) or 1:500 (post-fixation staining); anti-calnexin (Abcam, clone  
531 6F12BE10, mouse IgG2b) used at 1:100 (live-staining) and 1:200 (post-fixation  
532 staining). Secondary antibodies were goat anti-rabbit IgG and goat anti-mouse IgG  
533 (Alexa Fluor® 594) used at 1:500.

534

535 *Embryo fixation and dehydration*

536 Stage 19-22 embryos were washed x2 in PBS before removing the extra-embryonic  
537 tissues. Embryos were fixed in 4% w/v formaldehyde for 2h at 21°C, or overnight at  
538 4°C, then rinsed in PBS on a mechanical shaker for 5min and dehydrated through a  
539 series of 10min washes x1 with 25, 50, 75% v/v methanol/PBS and 100% methanol.  
540 After one further 30min wash in 100% methanol, embryos were stored in methanol at  
541 -20°C until required.

542

543 *Axon staining*

544 After rehydration into PBS-T, embryos were blocked in PBS-T/10% goat serum for 3h  
545 at 21°C, then incubated in fluorescein-conjugated PNA (Vector Labs) for sclerotome  
546 csPDI, or in anti-tubulin βIII (clone TUJ1, Mouse IgG2a, BioLegend) for axon  
547 staining, both at 1:500 in PBS-T/10% v/v goat serum for 12-18h at 4°C. Embryos  
548 were then washed x4 for 20min with PBS-T. Secondary antibody (peroxidase goat  
549 anti-mouse IgG, Jackson ImmunoResearch) was used at 1:500 in PBS-T/10% goat  
550 serum for 2h at 21°C, followed by 20min washes x4 in PBS-T. Embryos were then  
551 incubated with 500µg/ml diaminobenzidine (DAB) substrate and 0.006% H<sub>2</sub>O<sub>2</sub> in  
552 PBS/0.5% Triton, and the colour reaction was developed for 5-10min at 21°C.

553

554 *Vibratome sectioning*

555 Formaldehyde-fixed embryos were embedded in 10% gelatin (bloom 300, Sigma-  
556 Aldrich) in PBS at 38°C for 30min. Cryomolds (Tissue-Tek) with gelatin were set at  
557 21°C for 15min, after which embryos were transferred to them and the gelatin  
558 flattened and set at 4°C for 30min. Blocks were cut and fixed with 4% formaldehyde at  
559 4°C for at least 72h, then washed for 10min x3 in PBS, trimmed and mounted in a  
560 Leica VT1000 S vibratome. Sections were cut at 70µM using a steel blade and  
561 mounted on glass slides (VWR International) using Fluoromount G.

562

#### 563 *Primary cultures of rat cortical astrocytes*

564 Cortical hemispheres from neonatal rat pups (P1-P3) were isolated and dissected in  
565 ice-cold DMEM containing penicillin-streptomycin (Gibco). Care was taken to remove  
566 meninges and white matter. Cortices from up to 12 pups were pooled and sub-  
567 divided in a Petri dish using a razor blade. The tissue was transferred to a 15ml  
568 Falcon tube and spun briefly, then resuspended in 2ml papain solution [0.75% v/v  
569 of papain (25mg/ml, 17U/mg protein, Sigma-Aldrich), 40µg/ml DNase I type IV, 2mM  
570 L-Cysteine in DMEM with penicillin-streptomycin] and incubated for 1h at 37°C with  
571 occasional resuspension. The enzymatic digestion was quenched by adding 2ml  
572 trypsin-inhibitor solution [500ug/ml BSA, 40µg/ml DNase I type IV, 1mg/ml Trypsin  
573 inhibitor (Sigma-Aldrich)]. Cells were then dissociated by mechanical resuspension in  
574 1ml ovomucoid solution and collected by centrifugation in a 10ml trypsin-inhibitor  
575 solution. They were resuspended in culture medium and plated in poly-D-lysine-  
576 coated flasks (cells from 1-1.5 brains in one 75cm<sup>2</sup> culture flask). Cells were cultured  
577 at 37°C/5% CO<sub>2</sub> in DMEM (Gibco) supplemented with 10% FBS (Gibco) and  
578 penicillin-streptomycin. After 7-10d culture cells were shaken in an orbital shaker at  
579 350-400rpm (1.9cm orbital radius, MaxQ 4450, ThermoFisher Scientific) at 37°C to  
580 obtain a culture of cortical astrocytes. Microglia, neurons and oligodendrocytes were  
581 detached after an overnight shaking, and medium was then replaced. Cultures  
582 consisted in >90% GFAP-positive cells.

583

#### 584 *siRNA knockdown of csPDI*

585 The fluorescein-labelled siRNA used to knock down csPDI in the chick embryo was  
586 designed according to the sequence of an antisense phosphorothioate (S-oligo;  
587 nuclease-resistant oligonucleotide) successfully used by Zai *et al.*<sup>24</sup> to knock down  
588 csPDI/PDIA1/P4HB in a human erythroleukemia (HEL) cell line. These authors  
589 designed three antisense S-oligos against human PDIA1/P4HB mRNA, and one of  
590 these reduced the cell surface expression of P4HB significantly (by 74 ± 9.2%  
591 compared to the scrambled S-oligo control). The sequence for the successful oligo  
592 was 5'-GCAGCGAGACTCCGAACACGGTA-3', found in the 3' UTR of the  
593 human PDIA1/P4HB mRNA. This sequence was used to find an appropriate target  
594 sequence in the 3' UTR of chicken PDIA1/P4HB. The sequence used to target chick  
595 P4HB was 5'-TCGCCCTCACTTGTCTTTA-3', and was selected using BLAST NCBI  
596 anSfold (Wadsworth Center) to ensure maximum binding. A FITC-labelled control  
597 scrambled siRNA with the sequence 5'-GCTCTCTCGTCTATCTACT was designed  
598 using InvivoGen siRNA Wizard software <http://www.sirnawizard.com/scrambled.php>.  
599 All sequences were subjected to NCBI BLAST to ensure gene-specificity and to  
600 avoid mis-targeting. Rescue experiments used a plasmid encoding a fusion protein of  
601 mature human PDIA1 (18-508), tagged at its N-terminus with a bovine pre-pro-  
602 trypsinogen signal peptide (bPPTSP) and a FLAG-M1 epitope that is exposed after  
603 cleavage of the signal peptide (kind gift of Prof David Ron, Department of Clinical  
604 Biochemistry, University of Cambridge)<sup>61</sup>.

605

#### 606 *Primer design*

607 Transcript sequences for selected genes were obtained via the National Center for  
608 Biotechnology Information (NCBI) GenBank and Ensembl. Primer pairs for each  
609 transcript were designed using the Primer-Blast tool available from the NCBI



610 (<http://www.ncbi.nlm.nih.gov/tools/primer-blast/>). Primers were selected according to  
611 the following rules: (i) primer length 17-30 base pairs; (ii) CG content 50-60%; (iii)  
612 melting temperature 55-80°C; (iv) resulting amplification product 400-1200 base  
613 pairs. All potential primers were checked against the *G. gallus* (taxid:9031) genomic  
614 database using the Basic Local Alignment Search Tool (BLAST) from NCBI. The  
615 outputs from this last step were used to exclude all primers giving more than one  
616 significant region of identity (80% cut-off) against the whole chicken genome, or  
617 sharing more than 70% similarity with other genes. Selected primers were  
618 synthesized (Sigma-Aldrich) with the T7 promoter primer sequence  
619 (TAATACGACTCACTATAGGGAG) appended to the 5' end of the reverse primer, to  
620 allow direct generation of digoxigenin-labelled antisense RNA probe by *in vitro*  
621 transcription using T7 RNA polymerase.

622  
623 *Polymerase chain reaction (PCR) to prepare template for riboprobe synthesis*  
624 cDNA samples (2µl) were pipetted into a 200µl thin-wall centrifuge tube and 36µl of  
625 DEPC-treated water, 6µl of primer and 50µl of Reddy Mix PCR Master Mix (AB  
626 Gene) was added to each. The contents of the tube were briefly mixed and spun  
627 down. Tubes were then placed on a heating block of a hot-lid thermal cycler pre-  
628 heated to 95°C. Cycling commenced with an initial 2min denaturation step at 95°C  
629 followed by 34 cycles of 95°C for 25sec, annealing at 50°C for 45sec and elongation  
630 at 72°C for 1min; cycling finished with an extension step of 72°C for 5min. The PCR  
631 product length was checked by agarose gel electrophoresis, and the products stored  
632 at -20°C until needed for riboprobe synthesis.

633  
634 *Riboprobe synthesis*  
635 20µl *in vitro* transcription reactions were prepared by adding to a 200µl thin-wall PCR  
636 tube in the following order: 9µl DEPC-treated water, 4µl nucleoside triphosphate  
637 (NTP) mix (2.5mM ATP, 2.5mM CTP, 2.5mM GTP, 1.67mM UTP, 0.833mM  
638 digoxigenin-11-UTP), 2µl T7 transcription buffer (Ambion), 2µl T7 RNA polymerase,  
639 1µl RNase inhibitor (Invitrogen), and 2µl PCR product. The tube contents were mixed  
640 by pipetting and briefly spun in a microfuge (≤1000g) to settle them. The tube was  
641 further incubated at 37°C in a thermal cycler for 2h, after which 1µl DNase I was  
642 added and the tube further incubated in a thermal cycler for 15min at 37°C. To stop  
643 the reaction, 1µl of 0.5M EDTA was added and mixed by pipetting, and the tube  
644 contents spun down. The probe was then analysed using a Picodrop  
645 spectrophotometer.

646  
647 *Isolation of RNA for antisense RNA probes and cDNA synthesis*  
648 Embryos were rinsed with cold diethyl pyrocarbonate (DEPC)-PBS and transferred to  
649 a methanol-washed Petri dish coated with Sylgard. The extra-embryonic membranes  
650 were removed using Watchmaker's forceps pre-cleaned with RNase Zap (Ambion).  
651 Embryos were placed in RNAlater (Ambion) and stored overnight at 4°C. Total RNA  
652 was extracted using silica-membrane RNeasy spin columns (Qiagen) according to  
653 manufacturer's instructions. cDNA was synthesized using the iScript cDNA synthesis  
654 kit (Bio-Rad) according to manufacturer's instructions and stored at -20°C.

655  
656 *Whole-mount in situ hybridization (WMISH)*  
657 Our procedure was based on Wilkinson (1998)<sup>62</sup>. Embryos were rehydrated into  
658 PBS-T through a series of 75% v/v methanol/ultra-pure water, 50% v/v  
659 methanol/ultra-pure water, 25% v/v methanol/PBST. Embryos were transferred into  
660 18-well plates (Nunc). Unless otherwise specified, all reagents were diluted in PBS-T  
661 and washes were for 10min in PBS-T on a rocking platform at 21°C. To increase  
662 probe permeability embryos were incubated at 21°C in 10µg/ml proteinase K (Roche)  
663 for the following durations: embryos to stage 15 for 5min, stage 16-18 for 10min and  
664 stage 19-24 for 15min. Embryos were rinsed x1, post-fixed for 20min in 4%

665 formaldehyde and washed x2 to remove fixative. They were equilibrated with  
666 hybridization mix [50% v/v formamide, 5X SSC (Sigma-Aldrich), 2% blocking powder  
667 (Boehringer, 1096176), 0.1% Triton X-100, 0.1% CHAPS (Sigma-Aldrich), 1 mg/ml  
668 tRNA (Sigma-Aldrich), 5mM EDTA, 50 µg/ml heparin] by rinsing x1 in a 1:1 mixture of  
669 PBST/hybridization mix and then x2 in hybridization mix. Plates were then placed at  
670 67°C in a hybridization rocking oven for a minimum pre-hybridization of 2h to 12h  
671 maximum, after which the solution was changed to pre-warmed hybridization solution  
672 containing 1µg/ml RNA probe, and incubated for at least 12h to 72h maximum. In  
673 order to avoid cross contamination, WMISH probes were well separated when the  
674 hybridization was being done; vials were leak-proof, and each probe was used no  
675 more than x3. After incubation embryos were rinsed x2 and washed x1 with pre-  
676 warmed hybridization mix, washed x2 for 30min with hybridization mix, and then x2  
677 with a 1:1 mixture of hybridization mix/PBS-T at 60°C. Embryos were then rinsed x3  
678 with PBS-T. Hybridization solution was eliminated by 30min washes x7 in PBST at  
679 21°C in a rocking shaker. To block non-specific binding, embryos were incubated for  
680 1-3h in blocking solution (10% v/v Sigma-Aldrich sheep serum in PBS-T) at 21°C.  
681 This was replaced with blocking solution containing alkaline phosphatase-conjugated  
682 anti-digoxigenin Fab fragments (Roche) at 1:2000 dilution, and embryos were  
683 incubated further for 12-18h at 4°C. The antibody was removed by rinsing the  
684 embryos x3 in PBST with 1mM levamisol, followed by 4h of washes with buffer  
685 changes every 30min; in some cases embryos were left overnight at 4°C. Alkaline  
686 phosphatase was detected using a mixture of 4-nitro blue tetrazolium chloride (NBT)  
687 and 5-bromo-4-chloro-3'-indolyphosphate (BCIP). Embryos were first washed x2 in  
688 NTMT (100 mM NaCl, 100 mM Tris-HCl pH 9.5, 50 mM MgCl<sub>2</sub>, 0.1% Triton X-100),  
689 followed by addition of the reaction mixture (4.5 µl/ml NBT and 3.5 µl/ml BCIP in  
690 NTMT). Reactions were left in the dark until a deep purple colour had developed; this  
691 could take 3h to 5d, and in the latter case the stain solution was replaced daily.  
692 Embryos were then washed x3 in PBS-T and fixed in 4% w/v formaldehyde for 12-  
693 18h at 4°C. The fixative was removed by several PBS washes. Embryos were  
694 imaged using a Leica dissecting microscope and prepared for vibratome sectioning.

695

#### 696 *siRNA preparation*

697 Lyophilized FITC-labelled RNA duplexes (Dharmacon Thermo Scientific) were  
698 obtained in 2' deprotected, annealed and desalted form, dissolved in PCR grade  
699 water (Roche) at 3µg/µl and stored in aliquots at -80°C. The transfection solution was  
700 1µg/µl siRNA, 10% polyethylene glycol (PEG) (Carbowax 6000, Union Carbide) and  
701 20% Turbofect<sup>TM</sup> (Thermo Fisher Scientific, Catalog # R0541). For 2.8µl of siRNA  
702 preparation, 1µl of siRNA, 1.2µl of 20% PEG stock and 0.6µl of Turbofect<sup>TM</sup> were  
703 incubated at 21°C for 30min before application. This technique was also tested using  
704 pCAβ-EGFPm5<sup>63</sup>, a kind gift of Dr. Matthieu Vermeren (Department of Physiology,  
705 Development and Neuroscience, University of Cambridge, UK). The final transfection  
706 solution contained 2µg/µl plasmid, 10% PEG and 40% Turbofect<sup>TM</sup>. For a final 5µl of  
707 solution, 1µl of plasmid, 2µl of 20% PEG stock and 2µl of Turbofect<sup>TM</sup> were used;  
708 this solution was only used once. For siRNA delivery *in ovo*, borosilicate glass  
709 capillaries (WPI, outside diameter 1.5mm, inside diameter 1.12mm) were pulled on a  
710 Narishige Puller PC-10 at 62°C. Tips were broken to obtain a suitably narrow internal  
711 diameter and capillaries attached to a rubber tube/mouth-pipette.

712

#### 713 *In ovo transfection*

714 Eggs were cleaned with methanol and 3-4ml of ovalbumin removed using a 19G  
715 needle and syringe. The upper side of the egg was reinforced with adhesive tape and  
716 a window ~1cm diameter cut through shell and tape using curved scissors. The  
717 embryo was raised to the level of the window by re-pipetting the ovalbumin, and  
718 visualized by injection into the yolk of ~0.2ml black ink (Pelikan Fount India, 5% in  
719 PBS). A small incision was made in the vitelline membrane overlying the posterior

720 part of the embryo using a microscalpel. The glass capillary containing  
721 siRNA/plasmid transfection solution was inserted into the most posterior and newly  
722 formed somite of stage 10-14 embryos, and carefully advanced anteriorly within or  
723 immediately ventral to the somite mesoderm on one side of the embryo, parallel to  
724 the neural tube and dorsal to the endoderm, until the most anterior accessible somite  
725 was reached. The capillary was then slowly withdrawn and siRNA was injected into  
726 8-12 successive sclerotomes, each over 5-10 sec (~0.05 $\mu$ l total volume injected per  
727 embryo). Care was taken to avoid the upper two cervical segments where the avian  
728 spinal accessory nerve exits and ascends immediately adjacent to the neural tube.  
729 After pipette withdrawal the embryo was returned to the egg by removing 5ml of  
730 ovalbumin, and the window closed with adhesive tape. Each egg was re-incubated  
731 for 24h, when siRNA delivery in somites on the injected side was confirmed by the  
732 presence of fluorescence in >8 consecutive somites *in ovo* viewed by  
733 epifluorescence microscopy. Eggs were then incubated for 24h further to stages 22-  
734 24, when embryos were processed for somite strip or sclerotome cell culture and  
735 staining, or immunohistochemistry or *in situ* hybridization, all as described above.  
736

#### 737 *Antibodies*

738 Polyclonal rabbit anti-PDI (Sigma-Aldrich P7496) was prepared using PDI purified  
739 from bovine liver as immunogen. The whole serum was fractionated and further  
740 purified by ion-exchange chromatography to provide the IgG fraction essentially free  
741 of other rabbit serum proteins. In this study Lot#054K4801 (protein content 7.1mg/ml  
742 in 0.1M phosphate buffered saline pH 7.4 containing 15mM sodium azide) was used.  
743 Polyclonal anti-PDI antibody Abcam ab31811 (0.4mg/ml PDI Ab, 1% BSA, 2%  
744 Sodium Azide) was raised in rabbit against a synthetic peptide corresponding to  
745 human PDI amino acids 400-500 conjugated to keyhole limpet haemocyanin and  
746 immunogen affinity-purified; this contained IgG at 0.4mg/ml in 1% BSA, and PBS pH  
747 7.4 containing 0.02% sodium azide as preservative.  
748

#### 749 *PDI inhibitors*

750 Bacitracin (Fluka Lot#13Z3372) was examined for protease activity using azocasein  
751 (Sigma-Aldrich Lot#039K7002) as a substrate and protease from *Bacillus licheniformis*  
752 (Sigma-Aldrich Lot#040M1970V) as a standard<sup>33</sup>. A trace (<0.05%) of enzyme was  
753 detected and enzyme-free bacitracin reagent was prepared by gel filtration through  
754 Sephadex G100<sup>33</sup>. 16F16 (Lot#051M4613V), phenylarsine oxide (Lot#056K1654)  
755 and Rutin hydrate (quercetin-3-rutinoside:  $\geq$ 94%[HPLC] Lot#BCBH6323V) were  
756 purchased from Sigma-Aldrich. T3 (3,3',5' triiodo-L-thyronine: Sigma-Aldrich  $\geq$   
757 95%[HPLC] Lot#016K1628V) was acetylated with acetic acid N-hydroxysuccinimide  
758 ester (Apollo Scientific) as described<sup>64</sup> and the product shown to be homogeneous by  
759 thin layer chromatography. The propynoic acid carbamoyl methyl amines PACMA31  
760 & PACMA56 were synthesised as described<sup>29</sup>.  
761

#### 762 *Other reagents*

763 S-Nitrosoglutathione (Lot#055M403V), L-glutathione reduced (G4251  
764 Lot#SLBH7927V), L-glutathione oxidised (G4626 Lot#100K727625), DL-dithiothreitol  
765 (43819, Lot#BCBG3415V) and eosin 5-isothiocyanate (Lot#BCBK9368V) were  
766 obtained from Sigma-Aldrich, and L-homocysteine (Lot#B1612) from Santa Cruz  
767 Biotechnology. Sema 3A/Fc chimera was from R&D Systems (Lot#1250-53).  
768 Agarose bound Peanut Agglutinin (Lot#ZA0611; binding capacity >4.5mg  
769 asialofetuin/ml of gel) and Agarose bound Jacalin (Lot#ZA1021) were from Vector  
770 Laboratories. Cyanogen bromide-activated Sepharose 4B beads (Sigma C9142)  
771 were used to couple purified bovine serum albumin (BSA). After coupling the gel was  
772 blocked with 1mM ethanolamine. Beads used in these experiments contained  
773 9.48mg BSA per ml of settled gel.  
774

775 *Protein assay*

776 Protein assays were performed with bicinchoninic acid reagent [Pierce BCA protein  
777 assay kit (Lot#QA214075); Sigma Bicinchoninic acid solution (Lot#SHBH4613V) and  
778 copper(II) sulphate (Lot#SLBJ6167V) with bovine serum albumin (Pierce  
779 Lot#BB42996, 2.0mg/ml in 0.9% NaCl)] as standard, and using the enhanced  
780 protocol (60°C for 30min). A separate standard curve was constructed for each assay  
781 and the sample was subject to at least 3 separate dilutions which were each  
782 determined in duplicate.

783

784 *Purification of csPDI from somites*

785 A total of 400 chick embryo trunks were fractionated by affinity chromatography on  
786 agarose-bound-PNA (Vector Labs), following procedures used previously in the  
787 laboratory<sup>10</sup>. Care was taken to elute the affinity column with 0.5M NaCl 1% CHAPS  
788 (w/v) and 100mM Tris-HCl (pH7.5), followed by elution with 0.4M lactose/2% CHAPS  
789 (w/v) in PBS. Eluates (20µL) were concentrated using StrataClean Resin (Agilent  
790 Technologies)<sup>65,66</sup>. Protein bound to the resin was eluted using SDS reducing sample  
791 buffer with heating for five minutes at 95°C, followed by centrifugation (10000g for  
792 1min). The supernatant containing the proteins was fractionated on slab gels (7.5%  
793 acrylamide separating gel; 5% stacking gel). Samples were examined under reducing  
794 conditions and electrophoresis was performed in 25mM Tris (pH 8.3), 192mM  
795 glycine, 0.1% SDS. Molecular weight markers (BenchMark Protein Ladder,  
796 Invitrogen) were also run. The gel was developed with MS-compatible silver stain  
797 using the protocol of Blum *et al.*<sup>67</sup>. The band was excised in a laminar flow hood and  
798 submitted for mass spectrometry analysis (Alta Bioscience, UK).

799

800 *Identifying somite proteins that act as a substrate for S-nitrosylation*

801 The Pierce<sup>TM</sup> S-Nitrosylation Western Blot Kit (ThermoFisher Scientific) was used, in  
802 which a lower background is obtained with iodoTMTzero<sup>TM</sup> reagent (Lot# PA19543)  
803 compared with biotin labelling. A cell free assay was prepared in which 650 somite  
804 strips were homogenized in HENS buffer [1ml + 10µl protease inhibitor cocktail  
805 (Sigma Lot# 033M4023V)] using an electrically-driven disposable pestle and grinding  
806 resin (GE Healthcare). Following centrifugation at 1000g for 1 min at 10°C to remove  
807 the resin, the homogenate was centrifuged at 10,000g for 20 min. Aliquots of  
808 homogenate containing 200µg protein in 200µl of HENS buffer made 200µM with  
809 GSNO. Reduced glutathione was used as a negative control. After incubation at  
810 room temperature in the dark for 45min, unreacted GSNO was removed using P6  
811 microcolumns (BioRad) and the samples blocked with methyl methanethiosulfonate.  
812 Labelling with iodoTMT reagent was performed in the presence of sodium ascorbate  
813 and controls in the presence of water. Protein samples (48µg) were fractionated on  
814 NuPAGE 4-12% Bis Tris gels in MOPS buffer and blotted onto Hybond C-extra  
815 nitrocellulose membrane using NuPAGE transfer buffer (Thermo Fisher Scientific)  
816 containing antioxidant. Blots were probed with anti-TMT antibody (1:1000,  
817 Lot#OH190916) purified from mouse ascites fluid with Pierce Goat Anti-Mouse IgG  
818 (H+L) HRP conjugate (Lot#O192080).

819

820 *Identification of LC1 in somite extracts*

821 An extract of stage 19/20 chick embryo trunks was prepared in HENS buffer  
822 containing protease inhibitor (as above for somite strips) and the protein content  
823 quantified. An aliquot containing 25µg protein was fractionated on a 4-12% Bis-Tris  
824 gel and blotted onto Hybond C-extra nitrocellulose membrane using NuPAGE  
825 transfer buffer (Thermo Fisher Scientific) containing antioxidant. The blot was cut in  
826 half just above the 41K marker and the top half of the membrane was probed with  
827 rabbit anti-tubulin (Sigma, Lot#50K4813) followed by goat anti-rabbit IgG (HRP,  
828 Abcam Lot#GR3231028-7, 1:20,000). The bottom half was probed with MAP-1B  
829 (LC1) mouse monoclonal antibody against amino acids 2257-2357 of MAP-1B of



830 mouse origin (Santa Cruz Biotechnology, Inc., sc-136472) followed by goat anti-  
831 mouse IgG (HRP, Pierce Lot#TE262980, 1:20,000). Blots were blocked in 5% non-fat  
832 dried milk (BioRad) in TBST and thoroughly washed x5, each for 5 min, in TBST. In  
833 both above experiments blots were treated with Millipore Immobilon Western  
834 Reagent (Lot#1710401) and exposed to film.

835

#### 836 *Action of D-NAME and L-NAME on S-nitrosylation of LC1*

837 Somite extract (200µg protein for each condition) was incubated at 37°C for 1h in the  
838 presence of 300µM D-NAME (Sigma, Lot#BCBM7105V) or L-NAME  
839 (Sigma, Lot#BCBT1028). A control experiment with somite extract and buffer alone  
840 was included. Subsequently extracts were made 200µM in S-nitrosoglutathione and  
841 left at room temperature for 45 min before being processed as above and subjected  
842 to fractionation on a Nu-PAGE 4-12% Bis-Tris gel in MOPS buffer followed by  
843 blotting on Hybond C-extra. Care was taken to load equal amounts of protein (15µg  
844 per lane). Processed samples were assayed for protein levels with a Qubit  
845 Fluorometer 2.0 (Thermo Fisher Scientific) using the Qubit protein assay  
846 (quantitation range 0.25-5µg) to achieve the same quantity of sample in each lane.  
847 The blot was cut in half below the 53K molecular weight marker and the top half  
848 probed with rabbit anti-tubulin (Sigma, Lot#50K4813, 1:20,000) and goat anti-rabbit  
849 IgG (HRP, Abcam Lot#GR3231028-7) followed by Millipore Immobilon Western  
850 Reagent. The damp membrane was examined using an iBright FL1500 imaging  
851 system (Thermo Fisher Scientific) and the digital image caught directly by the  
852 instrument to authenticate that somite extract was loaded in every lane. The bottom  
853 half of the blot was probed with anti-iodoTMT (Lot#PH204668, 1:1000) and goat anti-  
854 mouse IgG (H+L) HRP, 1:20,000, followed by Clarity Western ECL substrate (mid-  
855 femtogram-level sensitivity, BioRad). The damp membrane was examined in the  
856 iBright FL1500 imaging system and the digital image captured.

857

#### 858 *Western blot of rat cortical astrocyte cell surface proteins*

859 Two month-old wild-type rats (*Rattus norvegicus*) were used as a source of neonatal  
860 rat cerebral cortical astrocytes. Four flasks of cortical astrocytes (in DMEM with 10%  
861 FBS and penicillin/streptomycin) at 95% confluence were subjected to biotinylation  
862 using a commercial 'Cell Surface Protein Isolation Kit' (ThermoScientific,  
863 Prod#89881, Lot#RD234938). Following labelling of the cell surface proteins with  
864 NMS-SS-Biotin reagent, the biotinylated proteins were captured on NeutrAvidin resin,  
865 washed thoroughly and the bound proteins released by cleavage of the S-S bond by  
866 treatment with freshly prepared SDS-PAGE sample buffer made 50mM with respect  
867 to DTT. One-third of this eluate was fractionated by SDS-PAGE on a 7.5%  
868 polyacrylamide resolving gel (120x80mmx3mm; 5% stacking gel) and blotted onto  
869 Hybond C-extra nitrocellulose membrane (Amersham Biosciences Batch No.  
870 319063) using 25mM Tris (pH8.3), 192mM glycine and 0.1% SDS electrophoresis  
871 buffer. The blot was blocked with 5% Blotting Grade Non Fat Dry Milk (BioRad) and  
872 developed with 1:20,000 anti-PDI (Sigma P7496) followed by 1:2000 Tidy Blot  
873 Western Blot Detection Reagent-HRP (BioRad, Batch#160129) and the use of  
874 Immobilon Western Chemiluminescent HRP substrate (Millipore).

875

#### 876 *Assessment of reductase activity in purified PDI*

877 Di-E-GSSG was prepared by the reaction of eosin isothiocyanate (Sigma-Aldrich)  
878 with L-glutathione oxidised (Sigma-Aldrich Lot#100K72765) as described in detail by  
879 Raturi & Mutus<sup>23</sup>. Four samples of PDI (4µg) were incubated in 20µl 100 mM  
880 potassium phosphate (pH7), made 1.5µM with respect to calcium and magnesium  
881 chloride, with 20µl packed PNA-agarose beads (Vector lot ZC0504) with a capacity  
882 to bind >90µg asialofetuin to 20µl beads. The beads were kept at 5°C over 18h with  
883 intermittent mixing. Following centrifugation at 14,000g for 5min at 4°C and a further  
884 wash with 30µl of buffer, the combined supernatant fluids were added to the reaction

885 mixture to give a maximum concentration 128nM PDI. Reductase activity was  
886 monitored as above<sup>23</sup>. Fluorescence was measured in a Biotronix Fluorometer  
887 (Electronics and Instrumentation Services for Biological Science, University of  
888 Cambridge).

889

#### 890 *Statistics*

891 A non-parametric Kruskal-Wallis one-way ANOVA was used for comparison of data  
892 sets. The Mann-Whitney U test was used for comparison between treatment  
893 conditions in collapse assays. For comparison between three or more data points a  
894 two-way ANOVA was performed, followed by a post-hoc Bonferroni correction. No  
895 statistical methods were used to predetermine sample size. Graphs and figures were  
896 produced with GraphPad Prism 7.0 and Adobe Photoshop CS6. Histograms show  
897 mean +/- s.e.m.

898

#### 899 *Acknowledgements*

900 We thank C. Stern, M.Bate, C.Holt, R.B.Heap and O.Paulsen for comments on the  
901 manuscript. The initial parts of this work were supported by grants from the Medical  
902 Research Council and the Wellcome Trust, and more recently by the Rosetrees  
903 Trust. J.S. was also supported by a studentship from the International Spinal  
904 Research Trust.

905

#### 906 *Author contributions*

907 G.M.W.C. and R.J.K. designed the experiments, analysed data and wrote the  
908 paper; G.M.W.C. also purified and synthesised some of the reagents, and R.J.K.  
909 carried out collapse assays and dissected embryo and brain material. C.S. and C.C.  
910 performed immunohistochemical and lectin staining of somites. C.S. and E.W.  
911 carried out *in ovo* injection experiments. J.S. performed live-staining and collapse  
912 assay experiments using astrocytic cells. K.W., P.J., S.P., N.S., A.H., A.A. and S.W.  
913 performed collapse assay experiments. G.M.W.C. and A.K. carried out biochemical  
914 experiments. G.R.-V. and P.C. performed *in ovo* bead implants. C.S. and R.J.K.  
915 carried out siRNA rescue experiments and M.R. assisted with design of the figures  
916 and statistics. All authors reviewed the manuscript.

917 **References**

- 918 1. Keynes, R. J. & Stern, C. D. Segmentation in the vertebrate nervous system.  
919 *Nature* **310**, 786-789 (1984).
- 920 2. Rickmann, M., Fawcett, J. W. & Keynes, R. J. The migration of neural crest  
921 cells and the growth of motor axons through the rostral half of the chick somite.  
922 *J Embryol Exp Morphol* **90**, 437-455 (1985).
- 923 3. Bronner-Fraser, M. Analysis of the early stages of trunk neural crest migration  
924 in avian embryos using monoclonal antibody HNK-1. *Dev Biol* **115**, 44-55  
925 (1986).
- 926 4. Fleming, A., Kishida, M. G., Kimmel, C. B. & Keynes, R. J. Building the  
927 backbone: the development and evolution of vertebral patterning. *Development*  
928 **142**, 1733-1744 (2015).
- 929 5. Gammill, L. S., Gonzalez, C., Gu, C. & Bronner-Fraser, M. Guidance of trunk  
930 neural crest migration requires neuropilin 2/semaphorin 3F signaling.  
931 *Development* **133**, 99-106 (2006).
- 932 6. Wang, H. U. & Anderson, D. J. Eph family transmembrane ligands can mediate  
933 repulsive guidance of trunk neural crest migration and motor axon outgrowth.  
934 *Neuron* **18**, 383-396 (1997).
- 935 7. Krull, C. E. et al. Interactions of Eph-related receptors and ligands confer  
936 rostrocaudal pattern to trunk neural crest migration. *Curr Biol* **7**, 571-580  
937 (1997).
- 938 8. Koblar, S. A. et al. Spinal motor axons and neural crest cells use different  
939 molecular guides for segmental migration through the rostral half-somite. *J*  
940 *Neurobiol* **42**, 437-447 (2000).
- 941 9. Schwarz, Q., Maden, C. H., Davidson, K. & Ruhrberg, C. Neuropilin-mediated  
942 neural crest cell guidance is essential to organise sensory neurons into  
943 segmented dorsal root ganglia. *Development* **136**, 1785-1789 (2009).
- 944 10. Davies, J. A., Cook, G. M., Stern, C. D. & Keynes, R. J. Isolation from chick  
945 somites of a glycoprotein fraction that causes collapse of dorsal root ganglion  
946 growth cones. *Neuron* **4**, 11-20 (1990).
- 947 11. Keynes, R. et al. Surround repulsion of spinal sensory axons in higher  
948 vertebrate embryos. *Neuron* **18**, 889-897 (1997).
- 949 12. Kapfhammer, J. P. & Raper, J. A. Collapse of growth cone structure on contact  
950 with specific neurites in culture. *J Neurosci* **7**, 201-212 (1987).
- 951 13. Raper, J. A. & Kapfhammer, J. P. The enrichment of a neuronal growth cone  
952 collapsing activity from embryonic chick brain. *Neuron* **4**, 21-29 (1990).
- 953 14. Stern, C. D., Sisodiya, S. M. & Keynes, R. J. Interactions between neurites and  
954 somite cells: inhibition and stimulation of nerve growth in the chick embryo. *J*  
955 *Embryol Exp Morphol* **91**, 209-226 (1986).
- 956 15. Kozlov, G., Määttänen, P., Thomas, D. Y. & Gehring, K. A structural overview of  
957 the PDI family of proteins. *FEBS J* **277**, 3924-3936 (2010).
- 958 16. Goldberger, R. F., Epstein, C. J. & Anfinsen, C. B. Acceleration of reactivation  
959 of reduced bovine pancreatic ribonuclease by a microsomal system from rat  
960 liver. *J Biol Chem* **238**, 628-635 (1963).
- 961 17. Ali Khan, H. & Mutus, B. Protein disulfide isomerase a multifunctional protein  
962 with multiple physiological roles. *Front Chem* **2**, 70 (2014).
- 963 18. Parakh, S. & Atkin, J. D. Novel roles for protein disulphide isomerase in disease  
964 states: a double edged sword. *Front Cell Dev Biol* **3**, 30 (2015).
- 965 19. Hausman, R. E. & Moscona, A. A. Purification and characterization of the  
966 retina-specific cell-aggregating factor. *Proc Natl Acad Sci U S A* **72**, 916-920  
967 (1975).
- 968 20. Pariser, H. P., Zhang, J. & Hausman, R. E. The cell adhesion molecule retina  
969 cognin is a cell surface protein disulfide isomerase that uses disulfide exchange  
970 activity to modulate cell adhesion. *Exp Cell Res* **258**, 42-52 (2000).

- 971 21. Bi, S., Hong, P. W., Lee, B. & Baum, L. G. Galectin-9 binding to cell surface  
972 protein disulfide isomerase regulates the redox environment to enhance T-cell  
973 migration and HIV entry. *Proc Natl Acad Sci U S A* **108**, 10650-10655 (2011).
- 974 22. Schaefer, K. et al. Galectin-9 binds to O-glycans on protein disulfide isomerase.  
975 *Glycobiology* **27**, 878-887 (2017).
- 976 23. Raturi, A. & Mutus, B. Characterization of redox state and reductase activity of  
977 protein disulfide isomerase under different redox environments using a  
978 sensitive fluorescent assay. *Free Radic Biol Med* **43**, 62-70 (2007).
- 979 24. Zai, A., Rudd, M. A., Scribner, A. W. & Loscalzo, J. Cell-surface protein  
980 disulfide isomerase catalyzes transnitrosation and regulates intracellular  
981 transfer of nitric oxide. *J Clin Invest* **103**, 393-399 (1999).
- 982 25. Sobierajska, K. et al. Protein disulfide isomerase directly interacts with  $\beta$ -actin  
983 Cys374 and regulates cytoskeleton reorganization. *J Biol Chem* **289**, 5758-  
984 5773 (2014).
- 985 26. Janiszewski, M. et al. Regulation of NAD(P)H oxidase by associated protein  
986 disulfide isomerase in vascular smooth muscle cells. *J Biol Chem* **280**, 40813-  
987 40819 (2005).
- 988 27. Hamburger, V. & Hamilton, H. L. A series of normal stages in the development  
989 of the chick embryo. *J Morphol* **88**, 49-92 (1951).
- 990 28. Everson, W. V. & Kao, W. W.-Y. in *Prolyl hydroxylase, protein disulfide*  
991 *isomerase and other structurally related proteins* (ed Guzman, N. A.) 109-126  
992 (CRC Press, New York, 1997).
- 993 29. Xu, S. et al. Discovery of an orally active small-molecule irreversible inhibitor of  
994 protein disulfide isomerase for ovarian cancer treatment. *Proc Natl Acad Sci U*  
995 *S A* **109**, 16348-16353 (2012).
- 996 30. Hess, D. T., Patterson, S. I., Smith, D. S. & Skene, J. H. Neuronal growth cone  
997 collapse and inhibition of protein fatty acylation by nitric oxide. *Nature* **366**, 562-  
998 565 (1993).
- 999 31. Bayir, H. et al. Increased S-nitrosothiols and S-nitrosoalbumin in cerebrospinal  
1000 fluid after severe traumatic brain injury in infants and children: indirect  
1001 association with intracranial pressure. *J Cereb Blood Flow Metab* **23**, 51-61  
1002 (2003).
- 1003 32. Massy, Z. A. et al. Increased plasma S-nitrosothiol levels in chronic  
1004 haemodialysis patients. *Nephrol Dial Transplant* **18**, 153-157 (2003).
- 1005 33. Rogelj, S., Reiter, K. J., Kesner, L., Li, M. & Essex, D. Enzyme destruction by a  
1006 protease contaminant in bacitracin. *Biochem Biophys Res Commun* **273**, 829-  
1007 832 (2000).
- 1008 34. Bennett, T. A., Edwards, B. S., Sklar, L. A. & Rogelj, S. Sulfhydryl regulation of  
1009 L-selectin shedding: phenylarsine oxide promotes activation-independent L-  
1010 selectin shedding from leukocytes. *J Immunol* **164**, 4120-4129 (2000).
- 1011 35. Primm, T. P. & Gilbert, H. F. Hormone binding by protein disulfide isomerase, a  
1012 high capacity hormone reservoir of the endoplasmic reticulum. *J Biol Chem*  
1013 **276**, 281-286 (2001).
- 1014 36. Hoffstrom, B. G. et al. Inhibitors of protein disulfide isomerase suppress  
1015 apoptosis induced by misfolded proteins. *Nat Chem Biol* **6**, 900-906 (2010).
- 1016 37. Sliskovic, I., Raturi, A. & Mutus, B. Characterization of the S-denitrosation  
1017 activity of protein disulfide isomerase. *J Biol Chem* **280**, 8733-8741 (2005).
- 1018 38. Owen, J. B. & Butterfield, D. A. in *Protein Misfolding and Cellular Stress in*  
1019 *Disease and Aging: Concepts and Protocols* (eds Bross, P. & Gregersen, N.)  
1020 269-277 (Springer Science & Business Media, 2010).
- 1021 39. Ascenzi, P. & Brunori, M. Myoglobin: a pseudo-enzymatic scavenger of nitric  
1022 oxide. *Biochemistry and Molecular Biology Education* **29**, 183-185 (2001).
- 1023 40. Rayner, B. S., Hua, S., Sabaretnam, T. & Witting, P. K. Nitric oxide stimulates  
1024 myoglobin gene and protein expression in vascular smooth muscle. *Biochem J*  
1025 **423**, 169-177 (2009).



- 1026 41. Stroissnigg, H. et al. S-nitrosylation of microtubule-associated protein 1B  
1027 mediates nitric-oxide-induced axon retraction. *Nat Cell Biol* **9**, 1035-1045  
1028 (2007).
- 1029 42. Keynes, R. J., Johnson, A. R., Picart, C. J., Dunin-Borkowski, O. M. & Cook, G.  
1030 M. A growth cone collapsing activity in chicken gray matter. *Ann N Y Acad Sci*  
1031 **633**, 562 (1991).
- 1032 43. Ghosh, A. & David, S. Neurite growth-inhibitory activity in the adult rat cerebral  
1033 cortical gray matter. *J Neurobiol* **32**, 671-683 (1997).
- 1034 44. Jasuja, R. et al. Protein disulfide isomerase inhibitors constitute a new class of  
1035 antithrombotic agents. *J Clin Invest* **122**, 2104-2113 (2012).
- 1036 45. Akiyama, H., Chaboissier, M. C., Martin, J. F., Schedl, A. & de Crombrugge,  
1037 B. The transcription factor Sox9 has essential roles in successive steps of the  
1038 chondrocyte differentiation pathway and is required for expression of Sox5 and  
1039 Sox6. *Genes Dev* **16**, 2813-2828 (2002).
- 1040 46. Stolt, C. C. et al. The Sox9 transcription factor determines glial fate choice in  
1041 the developing spinal cord. *Genes Dev* **17**, 1677-1689 (2003).
- 1042 47. Sun, W. et al. SOX9 Is an astrocyte-specific nuclear marker in the adult brain  
1043 outside the neurogenic regions. *J Neurosci* **37**, 4493-4507 (2017).
- 1044 48. Vermeren, M. M., Cook, G. M., Johnson, A. R., Keynes, R. J. & Tannahill, D.  
1045 Spinal nerve segmentation in the chick embryo: analysis of distinct axon-  
1046 repulsive systems. *Dev Biol* **225**, 241-252 (2000).
- 1047 49. Steketee, M. B. & Tosney, K. W. Contact with isolated sclerotome cells steers  
1048 sensory growth cones by altering distinct elements of extension. *J Neurosci* **19**,  
1049 3495-3506 (1999).
- 1050 50. Huber, A. B. et al. Distinct roles for secreted semaphorin signaling in spinal  
1051 motor axon guidance. *Neuron* **48**, 949-964 (2005).
- 1052 51. Ramachandran, N., Root, P., Jiang, X. M., Hogg, P. J. & Mutus, B. Mechanism  
1053 of transfer of NO from extracellular S-nitrosothiols into the cytosol by cell-  
1054 surface protein disulfide isomerase. *Proc Natl Acad Sci U S A* **98**, 9539-9544  
1055 (2001).
- 1056 52. Shah, C. M., Bell, S. E., Locke, I. C., Chowdrey, H. S. & Gorge, M. P.  
1057 Interactions between cell surface protein disulphide isomerase and S-  
1058 nitrosoglutathione during nitric oxide delivery. *Nitric Oxide* **16**, 135-142 (2007).
- 1059 53. Flögel, U., Merx, M. W., Godecke, A., Decking, U. K. & Schrader, J. Myoglobin:  
1060 A scavenger of bioactive NO. *Proc Natl Acad Sci U S A* **98**, 735-740 (2001).
- 1061 54. Cox, E. C., Müller, B. & Bonhoeffer, F. Axonal guidance in the chick visual  
1062 system: posterior tectal membranes induce collapse of growth cones from the  
1063 temporal retina. *Neuron* **4**, 31-37 (1990).
- 1064 55. Goplen, D. et al. Protein disulfide isomerase expression is related to the  
1065 invasive properties of malignant glioma. *Cancer Res* **66**, 9895-9902 (2006).
- 1066 56. Loh, K. H. et al. Proteomic analysis of unbounded cellular compartments:  
1067 synaptic clefts. *Cell* **166**, 1295-1307.e21 (2016).
- 1068 57. Xiao, G., Chung, T. F., Pyun, H. Y., Fine, R. E. & Johnson, R. J. KDEL proteins  
1069 are found on the surface of NG108-15 cells. *Brain Res Mol Brain Res* **72**, 121-  
1070 128 (1999).
- 1071 58. Cook, G. M., Jareonsettasin, P. & Keynes, R. J. Growth cone collapse assay.  
1072 *Methods Mol Biol* **1162**, 73-83 (2014).
- 1073 59. Manns, R. P., Cook, G. M., Holt, C. E. & Keynes, R. J. Differing semaphorin 3A  
1074 concentrations trigger distinct signaling mechanisms in growth cone collapse. *J*  
1075 *Neurosci* **32**, 8554-8559 (2012).
- 1076 60. He, Y., Yu, W. & Baas, P. W. Microtubule reconfiguration during axonal  
1077 retraction induced by nitric oxide. *J Neurosci* **22**, 5982-5991 (2002).
- 1078 61. Zito, E. et al. Oxidative protein folding by an endoplasmic reticulum-localized  
1079 peroxiredoxin. *Mol Cell* **40**, 787-797 (2010).

- 1080 62. Wilkinson, D. G. *In Situ Hybridization: A Practical Approach* (Oxford University  
1081 Press, Oxford, 1998).
- 1082 63. Bron, R. et al. Boundary cap cells constrain spinal motor neuron somal  
1083 migration at motor exit points by a semaphorin-plexin mechanism. *Neural Dev*  
1084 **2**, 21 (2007).
- 1085 64. Gallina, A. et al. Inhibitors of protein-disulfide isomerase prevent cleavage of  
1086 disulfide bonds in receptor-bound glycoprotein 120 and prevent HIV-1 entry. *J*  
1087 *Biol Chem* **277**, 50579-50588 (2002).
- 1088 65. Bonn, F. et al. Picking vanished proteins from the void: how to collect and  
1089 ship/share extremely dilute proteins in a reproducible and highly efficient  
1090 manner. *Anal Chem* **86**, 7421-7427 (2014).
- 1091 66. Otto, A., Maaß, S., Bonn, F., Büttner, K. & Becher, D. An Easy and Fast  
1092 Protocol for Affinity Bead-Based Protein Enrichment and Storage of Proteome  
1093 Samples. *Methods Enzymol* **585**, 1-13 (2017).
- 1094 67. Blum, H., Beier, H. & Gross, H. J. Improved silver staining of plant proteins,  
1095 RNA and DNA in polyacrylamide gels. *Electrophoresis* **8**, 93-99 (1987).
- 1096 68. Carmichael, D. F., Morin, J. E. & Dixon, J. E. Purification and characterization  
1097 of a thiol:protein disulfide oxidoreductase from bovine liver. *J Biol Chem* **252**,  
1098 7163-7167 (1977).
- 1099

1100 **Figures and Figure Legends**  
1101  
1102

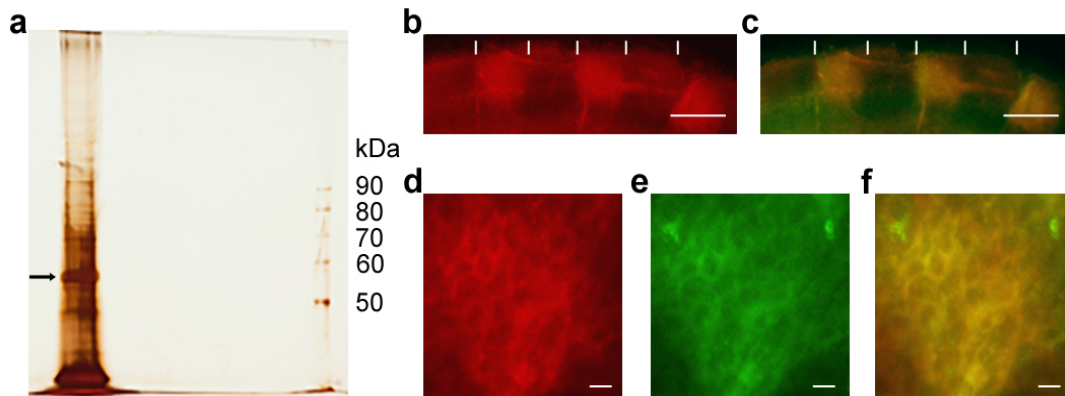

1103  
1104

1105 **Figure 1**

1106 *Identification of csPDI in somites*

1107 a, Silver-stained SDS-PAGE of lactose eluate of chick somite proteins bound to PNA-  
1108 agarose; arrow indicates the major band of 57kDa.  
1109 b, c, Somite strip live-stained with rhodamine-PNA (red, b) and co-stained with  
1110 fluorescein-conjugated anti-PDI; preferential staining of three P-half-sclerotomes is  
1111 shown; PNA staining and anti-PDI staining are co-localized (yellow, c); vertical white  
1112 lines indicate half-somite boundaries; Scale bars 50µM.  
1113 d-f, Higher magnification of b and c showing ring staining at the cell periphery by  
1114 rhodamine-PNA (d) and by fluorescein-conjugated anti-PDI (e), and their co-  
1115 localisation (yellow, f). Scale bars 5µM.

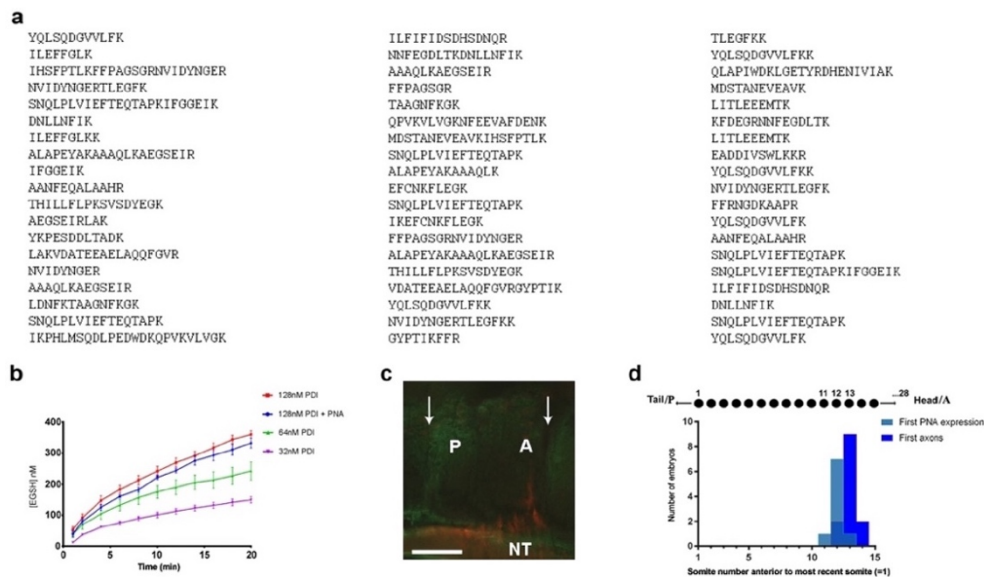

1116  
 1117

### Figure 1-figure supplement 1

#### Identification of csPDI in somites

1118  
 1119  
 1120 a, Identification of csPDI in somites by mass spectrometry. The major band seen in  
 1121 Fig. 1a (arrow) was carefully excised and dispatched to Alta Bioscience (UK) for  
 1122 tryptic digestion and examination by mass spectrometry. The 57-peptide tryptic  
 1123 digest amino acid sequences correspond to chicken PDI, subtype PDIA1 or P4HB.  
 1124  
 1125 b, Reductase activity in purified PDI. Three concentrations of purified PDI (Sigma-  
 1126 Aldrich; 128nM, 64nM, 32nM) were examined for reductase activity using dieosin  
 1127 glutathione disulphide (Di-E-GSSG). Two-way analysis of variance and multiple  
 1128 comparisons using the Bonferroni test showed no significant difference between the  
 1129 upper curves (blue and red). This is in accord with the carbohydrate composition of  
 1130 this enzyme preparation. Bovine liver PDI is a glycoprotein with 12% by weight of  
 1131 carbohydrate; L-fucose and N-acetylgalactosamine are not present in detectable  
 1132 quantities<sup>68</sup>. The lack of the latter sugar indicates that O-glycosylation is not a feature  
 1133 of this liver enzyme.  
 1134  
 1135 c, Onset of csPDI expression in somites. A parasagittal section (10 $\mu$ M) showing a  
 1136 somite with its A- and P-halves flanked on each side by adjacent half-somites,  
 1137 stained for csPDI using fluorescein-conjugated PNA (green), and for the first  
 1138 emerging spinal axons (red) using TUJ1 antibody; arrows indicate the somite  
 1139 boundaries; axons emerge from the neural tube in the A-half of the somite (A), and  
 1140 PNA-staining is visible in the P-half (P). NT, neural tube. Scale bar 40 $\mu$ M.  
 1141  
 1142 d, Onset of csPDI expression in 11 stage 16/17 chick embryos (26-32 somites),  
 1143 assessed using 10 $\mu$ M parasagittal sections of somites stained with fluorescein-  
 1144 conjugated PNA; the X-axis and upper schematic diagram show the somite positions  
 1145 (11, 12, 13) where PNA-staining was first detected in individual embryos, counting  
 1146 somites in a P-A (left-right) direction (most recently formed somite = 1). The first  
 1147 emerging spinal axons (stained using TUJ1 antibody) either coincided with the onset  
 1148 of PNA staining (1/11 embryos), or were delayed by the time taken to form one more  
 somite (9/11 embryos) or two more somites (1/11 embryos). Since each somite takes  
 ~90min to form, csPDI expression precedes axon outgrowth in each segment by  
 ~90-180min.



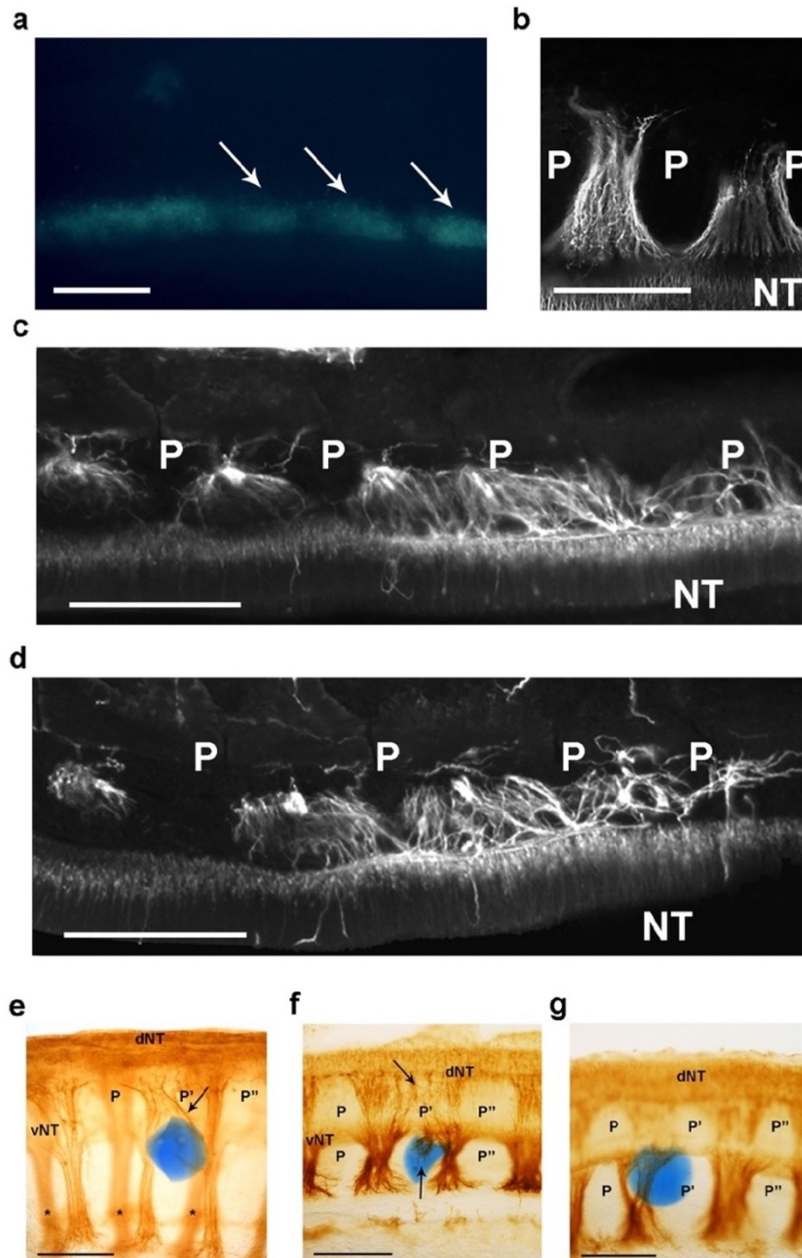

1149  
1150  
1151  
1152  
1153  
1154  
1155  
1156  
1157  
1158  
1159  
1160  
1161  
1162  
1163  
1164  
1165  
1166

## Figure 2

### *csPDI mediates nerve patterning in vivo*

a, Image of a live embryo *in ovo*, viewed from above, taken 24 hours after injection of fluorescein-labelled siRNA into somites (arrows) on one side; label is distributed throughout the A- and P-half-sclerotomes of each somite, and is visibly diminished at 3 consecutive somite boundaries. Scale bar 100µM.

b, Representative image of normal motor axon segmentation following scrambled siRNA delivery. Longitudinal section stained using fluorescein-conjugated TUJ1 antibody. Scale bar 100µM.

c, d, Loss of axon segmentation in two embryos after PDI siRNA knockdown. The siRNA-treated side of each embryo is shown; axons are segmented normally (left) but segmentation is absent (right) where axons grow into P-half-sclerotomes (P). NT, neural tube. Scale bars 100µM.

e, f, Loss of axon segmentation in embryos after *in ovo* implantation of PACMA 31-impregnated bead (blue); embryos were stained using HRP-labelled TUJ1 antibody and viewed as whole-mounts (e) or as implanted-side-only half-mounts (f); abnormal

1167 growth of sensory axons (arrow, e; upper arrow, f) towards dorsal neural tube (dNT)  
1168 in P-half-sclerotome (P'), compared with normal projections avoiding two adjacent P-  
1169 half-sclerotomes (P, P''); lower arrow (f) indicates motor axons sprouting from ventral  
1170 neural tube (vNT) into P-half-sclerotome; asterisks, spinal axons on opposite side of  
1171 whole-mount (e). Scale bars 150µM.  
1172 g, Normal segmentation of dorsal/sensory axons and ventral/motor axons after  
1173 implantation of PACMA 56 bead; P, P', P'', dorsal and ventral domains of 3  
1174 consecutive P-half-sclerotomes. Scale bar 150µM.

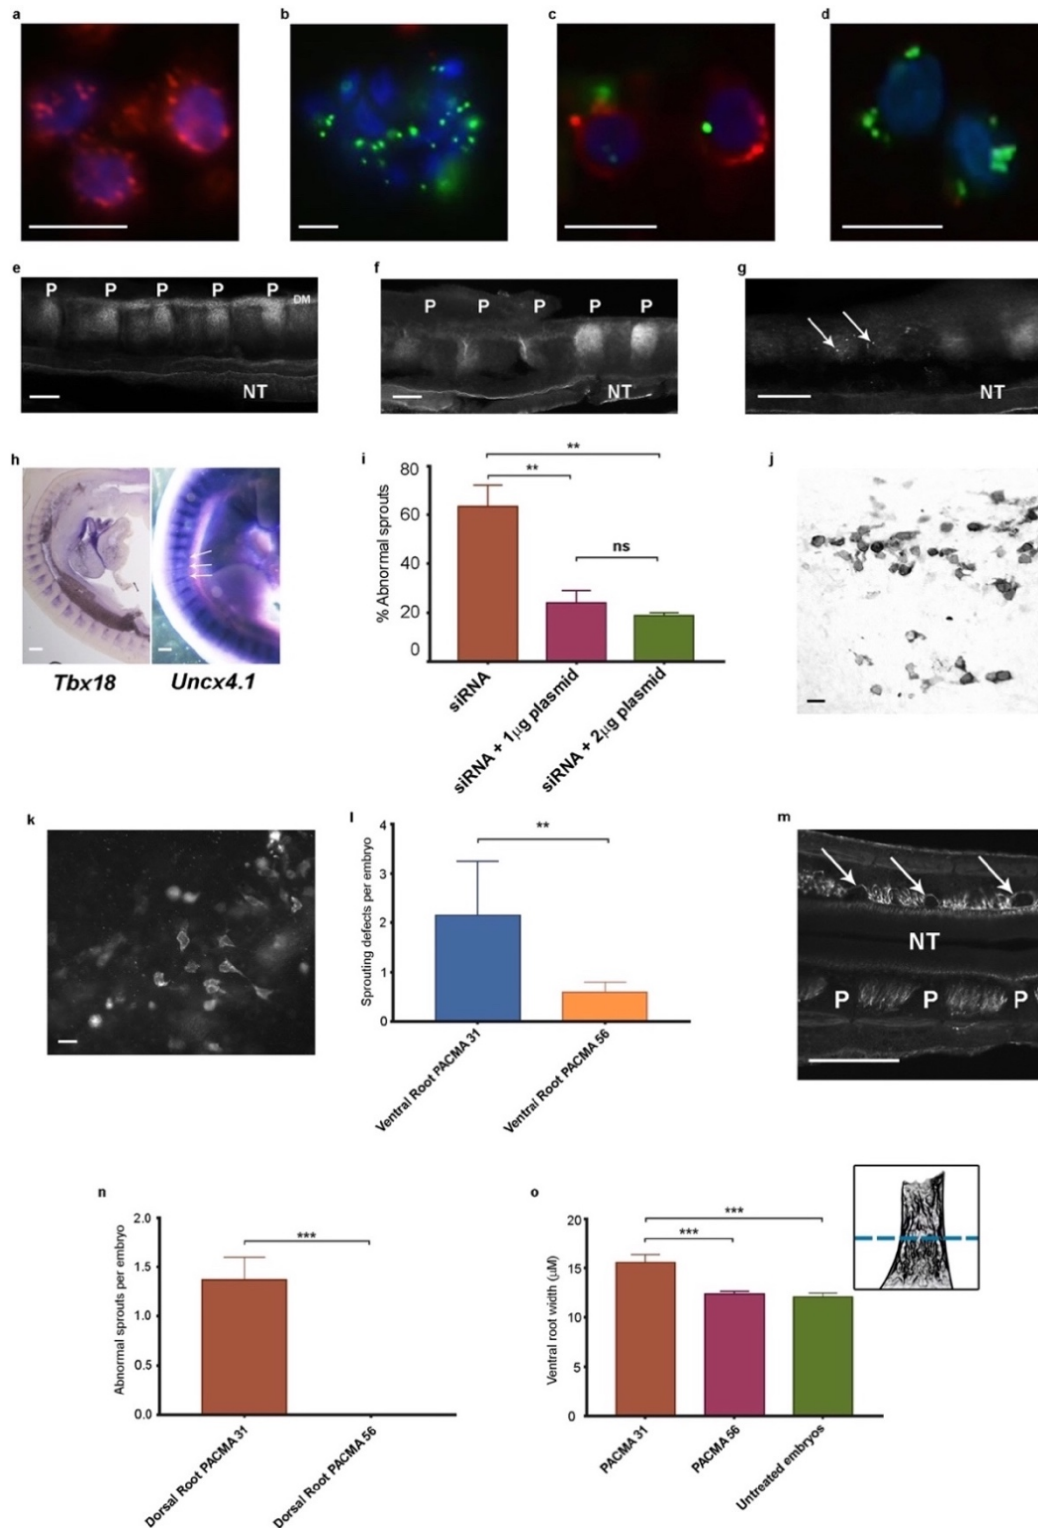

1175  
1176  
1177  
1178  
1179  
1180  
1181  
1182  
1183  
1184

**Figure 2-figure supplement 2**

a, Chick retinal cells after transfection with scrambled siRNA, stained with anti-PDI antibody (red) and the nuclear marker DAPI (blue). Scale bar 10µM.  
b, Stained as in a, after PDI knockdown using FITC-siRNA (green). Scale bar 10µM.  
c, d, P-half-sclerotome cells showing PDI expression (red) after transfection with scrambled FITC-siRNA (green) (c), and loss of PDI expression after knockdown with FITC-siRNA (green; d). Scale bar 10µM.

1185 e, Somite strip after injection of control scrambled siRNA, showing normal PNA  
1186 expression in 5 P-half-sclerotomes along the A-P axis. P-half-sclerotome, P;  
1187 Dermomyotome, DM; neural tube, NT. Scale bar 50 $\mu$ M.  
1188 f, g, Somite strips stained for PNA after siRNA PDI knockdown. f, loss of PNA  
1189 staining in three P-half-somites (left) compared with two normally stained P-half-  
1190 somites (right); P, P-half-sclerotome; g, loss of PNA staining in two segments with  
1191 residual spots of FITC-siRNA expression (arrows). Scale bars 50 $\mu$ M.  
1192 h, Left, sagittal section of a stage 22 siRNA-transfected embryo, hybridized with a  
1193 *Tbx18* probe; regional expression in A-half-somites is unaltered. Scale bar 100 $\mu$ M.  
1194 Right, stage 22 PDI-siRNA transfected whole-mounted embryo, hybridized with an  
1195 *Uncx4.1* probe, showing diminished expression in 3 P-half-sclerotomes (arrows).  
1196 Scale bar 100 $\mu$ M.  
1197 i, Rescue of siRNA-induced ventral root/motor axon phenotype by co-injection *in ovo*  
1198 of siRNA with PDI-expressing plasmid (1 $\mu$ g or 2 $\mu$ g as indicated). For each histogram  
1199 bar, 10 consecutive somites in the injected region of each embryo were assessed  
1200 (blind-coded) for the presence or absence of motor axons projecting abnormally into  
1201 P-half-somite, using anti-TUJ1-stained whole-mounted embryos.  
1202 j, Sclerotome cells stained with HRP-labelled anti-PDI antibody in a whole-mounted  
1203 embryo that received co-injected siRNA and plasmid (1 $\mu$ g). Scale bar 5 $\mu$ M.  
1204 k, Sclerotome cells stained with fluorescein-conjugated anti-FLAG-M1 antibody in a  
1205 whole-mounted embryo that received co-injected siRNA and plasmid (1 $\mu$ g). Scale  
1206 bar 5 $\mu$ M.  
1207 l, PACMA 31 (200 $\mu$ M administered by direct injection to somites on one side *in ovo*)  
1208 caused a significant increase in aberrant motor/ventral root axon sprouting compared  
1209 with PACMA 56 injection.  
1210 m, PACMA 31 (200 $\mu$ M by direct injection *in ovo*) resulted in dorsal 'bridges' of  
1211 sensory axons (arrows) interconnecting adjacent axon bundles, contrasting with the  
1212 normal dorsal/sensory axon segmentation on the non-injected side (NT, neural tube;  
1213 P, P-half-sclerotome). Scale bar 100 $\mu$ M.  
1214 n, PACMA 31 (200 $\mu$ M by direct injection *in ovo*) showing the incidence of dorsal  
1215 bridges of sensory axons in PACMA 31-injected embryos compared with their  
1216 absence in PACMA 56-injected embryos (P56).  
1217 o, Assessment of ventral root A-P width after PACMA injection (200 $\mu$ M) into somites  
1218 *in ovo*. Sections of stage-21 TUJ1-stained embryos were blind-coded and assessed  
1219 by fluorescence microscopy. Images were taken with QCapture Pro 6.0 and analyzed  
1220 with ImageJ, measuring the A-P width of the ventral root at the most proximal  
1221 position where constituent motor axons align in parallel (schematic inset upper right,  
1222 above dashed line); n=12 embryos (PACMA31), n=9 embryos (PACMA56), n=10  
1223 embryos (untreated).



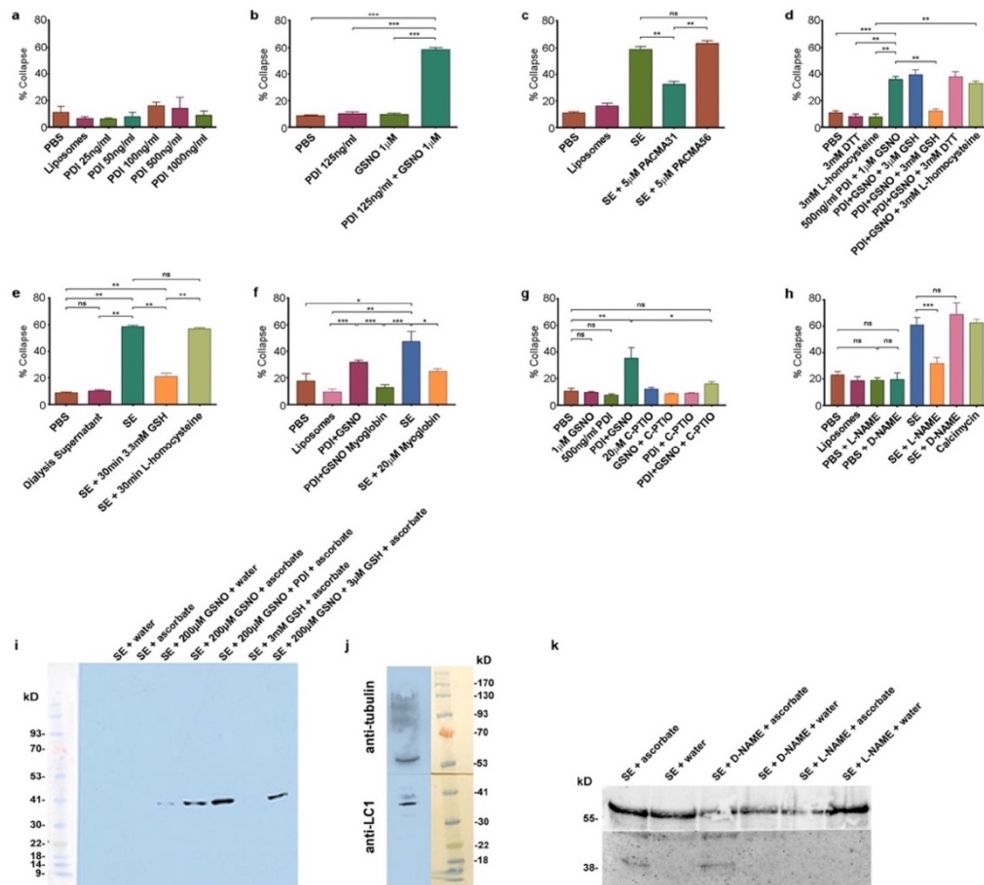

1224

1225

1226

### Figure 3

1227

#### csPDI mediates axon repulsion in vitro

1228

a, Collapse assays testing purified bovine PDI in liposomes at a range of concentrations; controls, phosphate-buffered saline (PBS) and untreated liposomes; histogram shows mean +s.e.m.

1229

b, Assays testing PDI and GSNO applied individually or concomitantly.

1230

c, Assays testing PACMA31 and PACMA56 on somite extracts (SE).

1231

d, Assays testing reducing agents at the concentrations indicated when applied either alone or together with PDI+GSNO.

1232

e, Assays testing GSH and L-homocysteine on SE-induced collapse.

1233

f, Assays testing myoglobin (20μM) on SE- and PDI+GSNO-induced collapse.

1234

g, Assays testing carboxy (C)-PTIO (20μM) on PDI+GSNO-induced collapse.

1235

h, Assays testing L-NAME and its control D-NAME on SE-induced collapse;

1236

calcimycin was used as a positive control.

1237

i, S-nitrosylated protein (iodo-TMT-labelled) in somites; protein samples (48μg) from

1238

somite cell-free extracts were fractionated on NuPAGE 4-12% Bis Tris gels as

1239

described in the Methods; lanes 1 & 2 are controls consisting of somite proteins only,

1240

with no detectable signal compared with lanes 3 & 4 where GSNO has been added;

1241

lane 3 is a control (treated with water) showing negligible iodoTMT labelling, and lane

1242

4 (reduced with ascorbate to generate a new free thiol for labelling) shows increased

1243

label; lane 5 shows that addition of PDI (1μg/0.1ml reaction mixture) enhances

1244

labelling; lane 6 shows that 3mM GSH in the absence of GSNO and PDI does not

1245

generate a signal; lane 7 shows that 3μM GSH is insufficient to interfere with

1246

nitrosylation, concurring with the findings of Sliskovic et al.<sup>37</sup>. The coloured molecular

1247

weight markers on the blot are shown on the left (BLUeye prestained protein ladder,

1248

2.5 μL, Geneflow).

1249

1250

1251

1252 j, Identification of LC1 in somite extract (25µg protein); the blot was cut in half above  
1253 the 41K marker and the top half of the membrane was probed with rabbit anti-tubulin  
1254 followed by goat anti-rabbit IgG; the bottom half was probed with mouse monoclonal  
1255 antibody against amino acids 2257-2357 of mouse MAP-1B (LC1) followed by goat  
1256 anti-mouse IgG. The molecular weight markers on the blot are shown to the right  
1257 (BLUeye prestained protein ladder, 3µl).  
1258 k, Identification of LC1 as a substrate for S-nitrosylation; cell-free somite extract  
1259 (200µg) was treated with D-NAME or L-NAME, followed by further incubation in  
1260 GSNO (200µM), as described in the Methods. Samples were then processed for the  
1261 presence of S-nitrosylated proteins using iodo-TMT as described in the Methods.  
1262 Protein samples (15µg) were then fractionated and blotted, after which the blot was  
1263 cut as described for Fig. 3j. The top half was treated with anti-tubulin and the bottom  
1264 half with anti-iodoTMT. L-NAME treatment blocked S-nitrosylation, as shown by the  
1265 lack of iodoTMT labelling. The control D-NAME was without effect.

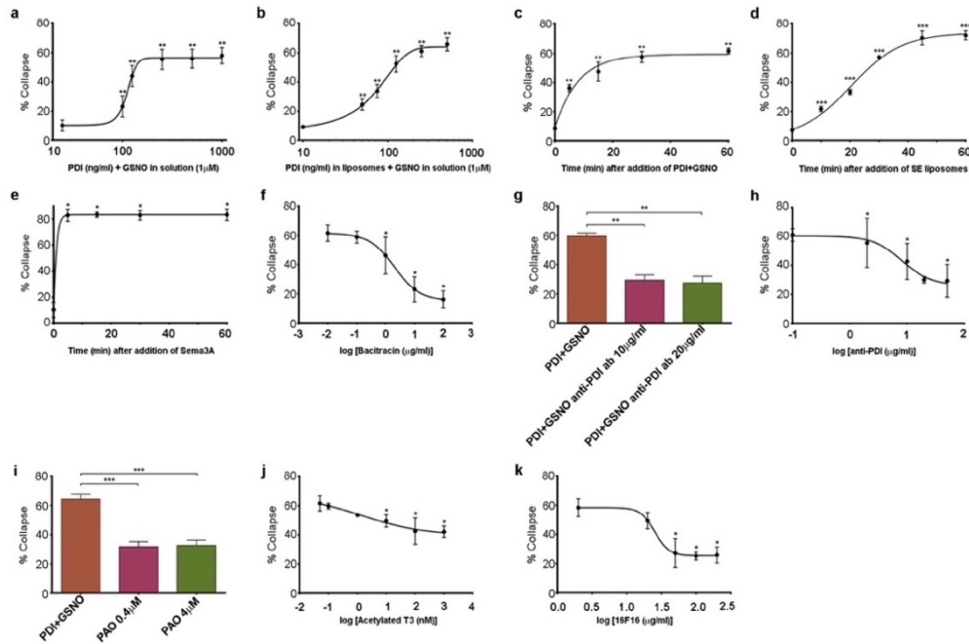

1266

1267

1268

1269

1270

1271

1272

1273

1274

1275

### Figure 3-figure supplement 3

a,b, Comparison of collapse induced by PDI+GSNO either in solution (a) or in liposomes (b) when PDI is applied at a range of concentrations together with GSNO (1 μM).

c-e, Comparison of collapse time course after applying PDI (125ng/ml) and GSNO (1 μM) in solution (c), after SE in liposomes (d), and after Sema3A (e).

f-k, Assays testing purified bacitracin (f), anti-PDI neutralizing antibody (g,h), PAO (i), T3 (j) and 16F16 (k) on PDI+GSNO-induced collapse.

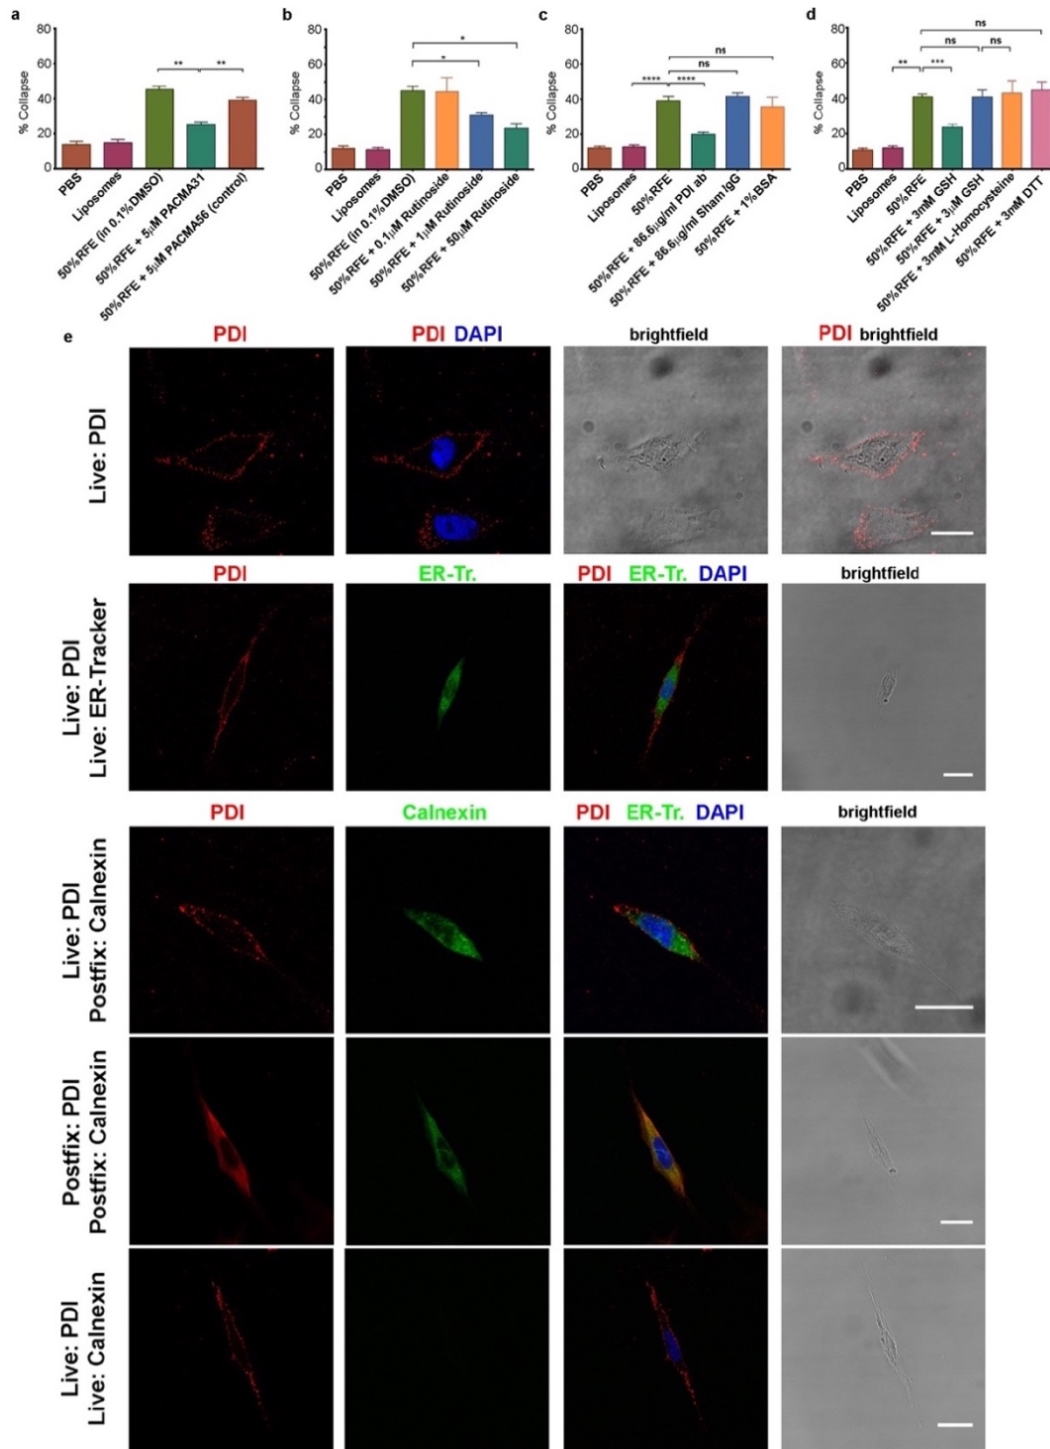

1276  
1277

**Figure 4**

*csPDI activity in mammalian forebrain*

1279 a-d, Collapse assays using PACMA 31 and PACMA 56 (a), quercetin-3-O-rutinoside  
1280 (b), immunodepletion (c), and reducing agents (d).  
1281 e, Immunocytochemistry on live human astrocytic (1718) cells. Scale bars 20μM.  
1282 Row 1, anti-PDI (red) shows PDI expression at the cell surface, DAPI-staining (blue)  
1283 shows position of nucleus. Row 2, anti-PDI live staining at the cell surface (red)  
1284 contrasts with selective staining of ER with ER-Tracker (green). Rows 3,4, fixation  
1285 permits visualisation of ER-PDI using anti-calnexin (green), which is absent under  
1286 live staining conditions (Row 5).  
1287



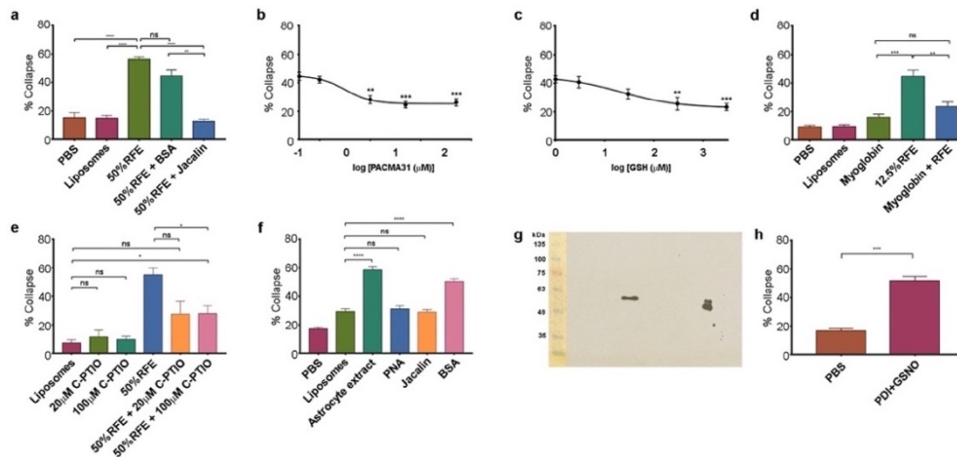

1288

1289

1290

**Figure 4-figure supplement 4**

1291 a, Collapse assays showing depletion of collapse activity in rat forebrain extract

1292 (RFE) by use of immobilized jacalrin; immobilized BSA was used as an additional

1293 control.

1294 b, Collapse assays showing quantification of PACMA31 dose/response relationship.

1295 c, Collapse assay and GSH titration.

1296 d, Collapse assays testing the NO scavenger myoglobin (20 μM).

1297 e, Collapse assays testing the NO scavenger C-PTIO.

1298 f, Collapse assays using dialysed extracts from human 1718 astrocytic cells, testing

1299 activity before and after depletion by immobilized PNA and jacalrin; immobilized BSA

1300 was used as an additional control.

1301 g, Western blot of rat cortical astrocyte cell surface preparation using anti-PDI

1302 antibody, showing one band at 57 kDa in the centre of the blot. The doublet (right) is

1303 control purified bovine PDI (500 ng), and the lower band indicates that this control

1304 sample was partially oxidised. Molecular weight markers (10 μl; BLUeye Prestained

1305 Wide Range Protein ladder, Geneflow) are shown (left), transferred from the gel to

1306 the blot.

1307 h, Collapse assays testing reactivity of chick retinal axon growth cones to

1308 PDI+GSNO.

SUPPLEMENTARY TABLE 1

| Figure                 | Treatment                                                                                                                                                                                                                    | # replicates (n) | Test                                                     | Value                                                             | Test                                                    | Value      |
|------------------------|------------------------------------------------------------------------------------------------------------------------------------------------------------------------------------------------------------------------------|------------------|----------------------------------------------------------|-------------------------------------------------------------------|---------------------------------------------------------|------------|
| 1b-1                   | Representative images of 15 replicates                                                                                                                                                                                       | 15               |                                                          |                                                                   |                                                         |            |
| ED 1b                  | 128nM PDI: 7 determinations, 3 enzyme batches; 64nM PDI: 7 determinations, 5 enzyme batches; 32nM PDI: 5 determinations, 3 enzyme batches; 12nM PDI + PNA agarose: 4 determinations, 2 enzyme batches, 2 PNA-agarose batches |                  | Two-way RM ANOVA > Bonferroni's multiple comparison test | F(10, 90) = 0.7658, p=0.661 (post-hoc, p > 0.999 all comparisons) |                                                         |            |
| 2a                     | Representative image of siRNA-injected embryos                                                                                                                                                                               | 331              |                                                          |                                                                   |                                                         |            |
| 2b                     | n = 144 embryos                                                                                                                                                                                                              | 144              |                                                          |                                                                   |                                                         |            |
| 2c,d                   | n = 241/149 embryos showed abnormal phenotype                                                                                                                                                                                | 149              |                                                          |                                                                   |                                                         |            |
| 2e,f                   | PACMA31: n = 141/29 embryos abnormal phenotype                                                                                                                                                                               | 29               |                                                          |                                                                   |                                                         |            |
| 2g                     | PACMA56: n = 19/20 embryos normal phenotype                                                                                                                                                                                  | 20               |                                                          |                                                                   |                                                         |            |
| ED 2a-d                | Representative images of 15 replicates                                                                                                                                                                                       | 15               |                                                          |                                                                   |                                                         |            |
| ED 2e-g                | Representative images of 4 replicates                                                                                                                                                                                        | 4                |                                                          |                                                                   |                                                         |            |
| ED 2h                  | Representative images of 6 replicates                                                                                                                                                                                        | 6                |                                                          |                                                                   |                                                         |            |
| ED 2i                  | siRNA                                                                                                                                                                                                                        | 9                |                                                          |                                                                   |                                                         |            |
|                        | siRNA + 1µg plasmid                                                                                                                                                                                                          | 10               | Mann-Whitney test (vs siRNA)                             | p = 0.0028                                                        |                                                         |            |
|                        | siRNA + 2µg plasmid                                                                                                                                                                                                          | 9                | Mann-Whitney test (vs siRNA)                             | p = 0.0019                                                        |                                                         |            |
| ED 2l                  | Ventral root, PACMA 31                                                                                                                                                                                                       | 8                | Mann-Whitney test (vs PACMA 56)                          | p < 0.01                                                          |                                                         |            |
|                        | Ventral root, PACMA 56                                                                                                                                                                                                       | 10               |                                                          |                                                                   |                                                         |            |
| ED 2n                  | Dorsal bridges, PACMA 31                                                                                                                                                                                                     | 8                | Mann-Whitney test (vs PACMA 56)                          | p < 0.001                                                         |                                                         |            |
|                        | Dorsal bridges, PACMA 56                                                                                                                                                                                                     | 10               |                                                          |                                                                   |                                                         |            |
| ED 2o                  | Ventral root width, PACMA 31                                                                                                                                                                                                 | 12               | Mann-Whitney test (vs PACMA 56)                          | p < 0.001                                                         |                                                         |            |
|                        | Ventral root width, PACMA 56                                                                                                                                                                                                 | 9                |                                                          |                                                                   |                                                         |            |
|                        | Ventral root, uninjected side                                                                                                                                                                                                | 10               |                                                          |                                                                   |                                                         |            |
| <b>COLLAPSE ASSAYS</b> |                                                                                                                                                                                                                              |                  |                                                          |                                                                   |                                                         |            |
| 3a                     | PBS                                                                                                                                                                                                                          | 6                | 1-way ANOVA Kruskal-Wallis test                          | p = 0.482                                                         |                                                         |            |
|                        | Liposomes                                                                                                                                                                                                                    | 7                |                                                          |                                                                   |                                                         |            |
|                        | PDI 25ng/ml                                                                                                                                                                                                                  | 3                |                                                          |                                                                   |                                                         |            |
|                        | PDI 50ng/ml                                                                                                                                                                                                                  | 3                |                                                          |                                                                   |                                                         |            |
|                        | PDI 100ng/ml                                                                                                                                                                                                                 | 3                |                                                          |                                                                   |                                                         |            |
|                        | PDI 500ng/ml                                                                                                                                                                                                                 | 3                |                                                          |                                                                   |                                                         |            |
|                        | PDI 1000ng/ml                                                                                                                                                                                                                | 3                |                                                          |                                                                   |                                                         |            |
| 3b                     | PBS                                                                                                                                                                                                                          | 10               |                                                          |                                                                   |                                                         |            |
|                        | PDI (125ng/ml)                                                                                                                                                                                                               | 8                | Mann-Whitney test (vs PBS)                               | p < 0.0001                                                        |                                                         |            |
|                        | GSNO (1µM)                                                                                                                                                                                                                   | 8                | Mann-Whitney test (vs PBS)                               | p < 0.0001                                                        |                                                         |            |
|                        | PDI+GSNO                                                                                                                                                                                                                     | 10               | Mann-Whitney test (vs PBS)                               | p < 0.0001                                                        |                                                         |            |
| 3c                     | PBS                                                                                                                                                                                                                          | 8                |                                                          |                                                                   |                                                         |            |
|                        | Liposomes                                                                                                                                                                                                                    | 7                |                                                          |                                                                   |                                                         |            |
|                        | Somite extract (SE)                                                                                                                                                                                                          | 12               |                                                          |                                                                   |                                                         |            |
|                        | SE + 5µM PACMA 31                                                                                                                                                                                                            | 18               | Mann-Whitney test (vs SE)                                | p < 0.0001                                                        | Mann-Whitney test (vs PACMA31)                          | p < 0.0001 |
|                        | SE + 5µM PACMA 56                                                                                                                                                                                                            | 11               | Mann-Whitney test (vs SE)                                | p = 0.137                                                         |                                                         |            |
| 3d                     | PBS                                                                                                                                                                                                                          | 7                | Mann-Whitney test (vs PDI+GSNO)                          | p = 0.003                                                         |                                                         |            |
|                        | DTT (3mM)                                                                                                                                                                                                                    | 4                | Mann-Whitney test (vs PDI+GSNO)                          | p = 0.0016                                                        |                                                         |            |
|                        | PDI+GSNO                                                                                                                                                                                                                     | 8                |                                                          |                                                                   |                                                         |            |
|                        | L-homocysteine (3mM)                                                                                                                                                                                                         | 4                | Mann-Whitney test (vs PDI+GSNO)                          | p = 0.0016                                                        |                                                         |            |
|                        | PDI+GSNO                                                                                                                                                                                                                     | 8                |                                                          |                                                                   |                                                         |            |
|                        | PDI+GSNO + GSH (3µM)                                                                                                                                                                                                         | 4                |                                                          |                                                                   |                                                         |            |
|                        | PDI+GSNO + GSH (3mM)                                                                                                                                                                                                         | 5                | Mann-Whitney test (vs PDI+GSNO)                          | p = 0.004                                                         |                                                         |            |
|                        | PDI+GSNO + DTT (3mM)                                                                                                                                                                                                         | 6                |                                                          |                                                                   |                                                         |            |
|                        | PDI+GSNO + L-homocysteine (3mM)                                                                                                                                                                                              | 6                | Mann-Whitney test (vs L-homocysteine (3mM))              | p = 0.002                                                         |                                                         |            |
| 3e                     | PBS                                                                                                                                                                                                                          | 4                |                                                          |                                                                   |                                                         |            |
|                        | Dialysis supernatant                                                                                                                                                                                                         | 3                | Mann-Whitney test (vs Dialysis supernatant)              | p = 0.40                                                          |                                                         |            |
|                        | SE                                                                                                                                                                                                                           | 7                | Mann-Whitney test (vs PBS)                               | p = 0.0061                                                        | Mann-Whitney test (vs Dialysis supernatant)             | p = 0.0167 |
|                        | SE + GSH (3mM)                                                                                                                                                                                                               | 5                | Mann-Whitney test (vs PBS)                               | p = 0.0159                                                        | Mann-Whitney test (vs SE)                               | p = 0.0025 |
|                        | SE + L-homocysteine                                                                                                                                                                                                          | 5                | Mann-Whitney test (vs SE)                                | p = 0.3434                                                        | Mann-Whitney test [vs SE + GSH (3.3mM)]                 | p = 0.0079 |
| 3f                     | PBS                                                                                                                                                                                                                          | 9                | Mann-Whitney test (vs SE)                                | p = 0.0342                                                        |                                                         |            |
|                        | Liposomes                                                                                                                                                                                                                    | 9                | Mann-Whitney test (vs PDI+GSNO)                          | p < 0.0001                                                        | Mann-Whitney test (vs SE)                               | p = 0.0012 |
|                        | PDI+GSNO                                                                                                                                                                                                                     | 8                | Mann-Whitney test [vs SE + myoglobin (20µM)]             | p = 0.036                                                         |                                                         |            |
|                        | PDI+GSNO + myoglobin                                                                                                                                                                                                         | 12               | Mann-Whitney test (vs PDI+GSNO)                          | p < 0.0001                                                        | Mann-Whitney test [vs SE + myoglobin (20µM)]            | p = 0.0019 |
|                        | SE                                                                                                                                                                                                                           | 9                | Mann-Whitney test (vs PDI+GSNO + myoglobin)              | p = 0.0009                                                        | Mann-Whitney test [vs PDI+GSNO + SE + myoglobin (20µM)] | p = 0.040  |
|                        | SE + myoglobin (20µM)                                                                                                                                                                                                        | 9                | Mann-Whitney test (vs Liposomes)                         | p = 0.0005                                                        |                                                         |            |
| 3g                     | PBS                                                                                                                                                                                                                          | 6                | Mann-Whitney test (vs PDI+GSNO)                          | p = 0.0043                                                        |                                                         |            |
|                        | GSNO (1µM)                                                                                                                                                                                                                   | 4                | Mann-Whitney test (vs PBS)                               | p > 0.999                                                         |                                                         |            |
|                        | PDI (500ng/ml)                                                                                                                                                                                                               | 4                | Mann-Whitney test (vs PBS)                               | p = 0.257                                                         |                                                         |            |
|                        | PDI+GSNO                                                                                                                                                                                                                     | 6                | Mann-Whitney test (vs PDI+GSNO + C-PTIO)                 | p = 0.013                                                         |                                                         |            |
|                        | C-PTIO (20µM)                                                                                                                                                                                                                | 6                |                                                          |                                                                   |                                                         |            |
|                        | C-PTIO + GSNO                                                                                                                                                                                                                | 6                |                                                          |                                                                   |                                                         |            |
|                        | PDI + C-PTIO                                                                                                                                                                                                                 | 6                |                                                          |                                                                   |                                                         |            |
|                        | PDI+GSNO + C-PTIO                                                                                                                                                                                                            | 6                | Mann-Whitney test (vs PBS)                               | p = 0.132                                                         |                                                         |            |
| 3h                     | PBS                                                                                                                                                                                                                          | 11               |                                                          |                                                                   |                                                         |            |
|                        | Liposomes                                                                                                                                                                                                                    | 14               |                                                          |                                                                   |                                                         |            |
|                        | PBS + L-NAME                                                                                                                                                                                                                 | 10               | Mann-Whitney test (vs PBS)                               | p = 0.2437                                                        |                                                         |            |
|                        | PBS + D-NAME                                                                                                                                                                                                                 | 7                | Mann-Whitney test (vs PBS)                               | p = 0.2463                                                        | Mann-Whitney test (vs PBS + L-NAME)                     | p = 0.906  |
|                        | SE                                                                                                                                                                                                                           | 9                |                                                          |                                                                   |                                                         |            |
|                        | SE + L-NAME                                                                                                                                                                                                                  | 15               | Mann-Whitney test (vs SE)                                | p = 0.0009                                                        |                                                         |            |
|                        | SE + D-NAME                                                                                                                                                                                                                  | 4                | Mann-Whitney test (vs SE)                                | p = 0.3958                                                        |                                                         |            |
|                        | Calcimycin                                                                                                                                                                                                                   | 5                |                                                          |                                                                   |                                                         |            |
| ED 3a                  | Each PDI concentration                                                                                                                                                                                                       | 3 or 5           |                                                          |                                                                   |                                                         |            |
| ED 3b                  | Each PDI concentration                                                                                                                                                                                                       | 4                |                                                          |                                                                   |                                                         |            |
| ED 3c                  | Each time point                                                                                                                                                                                                              | 6                |                                                          |                                                                   |                                                         |            |
| ED 3d                  | Each time point                                                                                                                                                                                                              | 3 or 4           |                                                          |                                                                   |                                                         |            |
| ED 3e                  | Each time point                                                                                                                                                                                                              | 3 or 4           |                                                          |                                                                   |                                                         |            |
| ED 3f                  | Each PDI concentration                                                                                                                                                                                                       | 3-5              |                                                          |                                                                   |                                                         |            |
| ED 3g                  | PDI+GSNO                                                                                                                                                                                                                     | 4                |                                                          |                                                                   |                                                         |            |
|                        | PDI+GSNO + ab (10µg/ml)                                                                                                                                                                                                      | 8                | Mann-Whitney test (vs PDI+GSNO)                          | p = 0.0040                                                        |                                                         |            |
| ED 3h                  | Each PDI concentration                                                                                                                                                                                                       | 3-6              |                                                          |                                                                   |                                                         |            |
| ED 3i                  | PDI+GSNO                                                                                                                                                                                                                     | 9                |                                                          |                                                                   |                                                         |            |
|                        | PAO (0.4µM)                                                                                                                                                                                                                  | 7                | Mann-Whitney test (vs PDI+GSNO)                          | p = 0.0002                                                        |                                                         |            |
|                        | PAO (4µM)                                                                                                                                                                                                                    | 8                | Mann-Whitney test (vs PDI+GSNO)                          | p < 0.0001                                                        |                                                         |            |
| ED 3j                  | Each T3 concentration                                                                                                                                                                                                        | 3 or 4           |                                                          |                                                                   |                                                         |            |
| ED 3k                  | Each 16F16 concentration                                                                                                                                                                                                     | 3                |                                                          |                                                                   |                                                         |            |
| 4a                     | PBS                                                                                                                                                                                                                          | 7                |                                                          |                                                                   |                                                         |            |
|                        | Liposomes                                                                                                                                                                                                                    | 8                |                                                          |                                                                   |                                                         |            |
|                        | RFE (50%)                                                                                                                                                                                                                    | 10               | Mann-Whitney test (vs RFE + PACMA31 (5µM))               | p < 0.0001                                                        |                                                         |            |
|                        | RFE + PACMA31 (5µM)                                                                                                                                                                                                          | 17               |                                                          |                                                                   |                                                         |            |
| 4b                     | PBS                                                                                                                                                                                                                          | 14               |                                                          |                                                                   |                                                         |            |
|                        | Liposomes                                                                                                                                                                                                                    | 15               |                                                          |                                                                   |                                                         |            |
|                        | RFE (50%)                                                                                                                                                                                                                    | 33               |                                                          |                                                                   |                                                         |            |
|                        | RFE + Rutinoside (0.1µM)                                                                                                                                                                                                     | 26               |                                                          |                                                                   |                                                         |            |
|                        | RFE + Rutinoside (1µM)                                                                                                                                                                                                       | 4                | Mann-Whitney test [vs RFE (50%)]                         | p = 0.0292                                                        |                                                         |            |
|                        | Rutinoside (50µM)                                                                                                                                                                                                            | 6                | Mann-Whitney test (vs RFE (50%))                         | p = 0.0100                                                        |                                                         |            |
| 4c                     | PBS                                                                                                                                                                                                                          | 13               |                                                          |                                                                   |                                                         |            |
|                        | Liposomes                                                                                                                                                                                                                    | 18               |                                                          |                                                                   |                                                         |            |
|                        | RFE (50%)                                                                                                                                                                                                                    | 18               | Mann-Whitney test (vs Liposomes)                         | p < 0.0001                                                        |                                                         |            |
|                        | RFE + anti-PDI                                                                                                                                                                                                               | 22               | Mann-Whitney test (vs RFE (50%))                         | p < 0.0001                                                        |                                                         |            |
|                        | RFE + IgG                                                                                                                                                                                                                    | 20               | Mann-Whitney test (vs RFE (50%))                         | p = 0.3651                                                        |                                                         |            |
|                        | RFE + BSA                                                                                                                                                                                                                    | 10               | Mann-Whitney test (vs RFE (50%))                         | p = 0.5478                                                        |                                                         |            |
| 4d                     | PBS                                                                                                                                                                                                                          | 17               |                                                          |                                                                   |                                                         |            |
|                        | Liposomes                                                                                                                                                                                                                    | 18               |                                                          |                                                                   |                                                         |            |
|                        | RFE (50%)                                                                                                                                                                                                                    | 18               | Mann-Whitney test (vs Liposomes)                         | p < 0.0001                                                        |                                                         |            |
|                        | RFE + GSH (3mM)                                                                                                                                                                                                              | 20               | Mann-Whitney test (vs RFE (50%))                         | p < 0.0001                                                        |                                                         |            |
|                        | RFE + GSH (3µM)                                                                                                                                                                                                              | 6                | Mann-Whitney test (vs RFE (50%))                         | p = 0.7603                                                        |                                                         |            |
|                        | RFE + GSH + L-homocysteine (3mM)                                                                                                                                                                                             | 7                | Mann-Whitney test (vs RFE + GSH (3µM))                   | p = 0.9452                                                        |                                                         |            |
|                        | RFE + DTT (3mM)                                                                                                                                                                                                              | 12               | Mann-Whitney test (vs RFE (50%))                         | p = 0.8995                                                        |                                                         |            |
| 4e                     | Representative images of 3 replicates                                                                                                                                                                                        |                  |                                                          |                                                                   |                                                         |            |
| ED 4a                  | PBS                                                                                                                                                                                                                          | 14               | Mann-Whitney test (vs Liposomes)                         | p < 0.0001                                                        |                                                         |            |
|                        | Liposomes                                                                                                                                                                                                                    | 25               | Mann-Whitney test (vs RFE (50%))                         | p < 0.0001                                                        |                                                         |            |
|                        | RFE (50%)                                                                                                                                                                                                                    | 36               |                                                          |                                                                   |                                                         |            |
|                        | RFE + BSA                                                                                                                                                                                                                    | 9                |                                                          |                                                                   |                                                         |            |
|                        | RFE + Jacalin                                                                                                                                                                                                                | 40               |                                                          |                                                                   |                                                         |            |
| ED 4b                  | Each PACMA31 concentration                                                                                                                                                                                                   | 5-20             |                                                          |                                                                   |                                                         |            |
| ED 4c                  | Each GSH concentration                                                                                                                                                                                                       | 6-19             |                                                          |                                                                   |                                                         |            |
| ED 4d                  | PBS                                                                                                                                                                                                                          | 9                |                                                          |                                                                   |                                                         |            |
|                        | Liposomes                                                                                                                                                                                                                    | 12               |                                                          |                                                                   |                                                         |            |
|                        | RFE                                                                                                                                                                                                                          | 8                | Mann-Whitney test (vs Myoglobin)                         | p < 0.0001                                                        |                                                         |            |
|                        | RFE + myoglobin                                                                                                                                                                                                              | 14               | Mann-Whitney test (vs RFE)                               | p = 0.0022                                                        |                                                         |            |
|                        | Myoglobin                                                                                                                                                                                                                    | 15               | Mann-Whitney test (vs RFE + myoglobin)                   | p = 0.0714                                                        |                                                         |            |
| ED 4e                  | Liposomes                                                                                                                                                                                                                    | 5                | Mann-Whitney test (vs C-PTIO (20µM))                     | p = 0.8329                                                        |                                                         |            |
|                        | C-PTIO (20µM)                                                                                                                                                                                                                | 8                |                                                          |                                                                   |                                                         |            |
|                        | C-PTIO (100µM)                                                                                                                                                                                                               | 6                | Mann-Whitney test (vs Liposomes)                         | p = 0.5368                                                        |                                                         |            |
|                        | RFE                                                                                                                                                                                                                          | 6                | Mann-Whitney test (vs RFE + C-PTIO (20µM))               | p = 0.0519                                                        |                                                         |            |
|                        | RFE + C-PTIO (20µM)                                                                                                                                                                                                          | 5                | Mann-Whitney test (vs Liposomes)                         | p = 0.0556                                                        |                                                         |            |
|                        | RFE + C-PTIO (100µM)                                                                                                                                                                                                         | 7                | Mann-Whitney test (vs Liposomes)                         | p = 0.0101                                                        | Mann-Whitney test (vs RFE)                              | p = 0.0140 |
| ED 4f                  | PBS                                                                                                                                                                                                                          | 34               |                                                          |                                                                   |                                                         |            |
|                        | Liposomes                                                                                                                                                                                                                    | 45               |                                                          |                                                                   |                                                         |            |
|                        | 1718 cell extract                                                                                                                                                                                                            | 37               | Mann-Whitney test (vs Liposomes)                         | p < 0.0001                                                        |                                                         |            |
|                        | 1718 extract + PNA                                                                                                                                                                                                           | 32               | Mann-Whitney test (vs Liposomes)                         | p = 0.3934                                                        |                                                         |            |
|                        | 1718 extract + Jacalin                                                                                                                                                                                                       | 27               | Mann-Whitney test (vs Liposomes)                         | p = 0.8714                                                        |                                                         |            |
|                        | 1718 extract + BSA                                                                                                                                                                                                           | 53               | Mann-Whitney test (vs Liposomes)                         | p < 0.0001                                                        |                                                         |            |
| ED 4h                  | PBS                                                                                                                                                                                                                          | 10               |                                                          |                                                                   |                                                         |            |
|                        | PDI (500ng/ml)+GSNO (1µM)                                                                                                                                                                                                    | 11               | Mann-Whitney test (vs PBS)                               | p < 0.0001                                                        |                                                         |            |
